# Supplementary material for: Combining growth-promoting genes leads to positive epistasis in Arabidopsis thaliana
Source: eLife journal article supplement (doi:10.7554/elife.02252), 2014-04-29

1

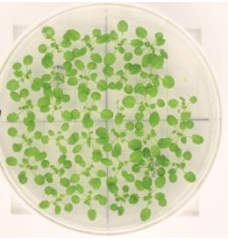

2

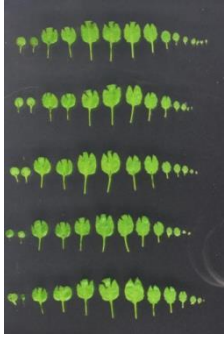

3

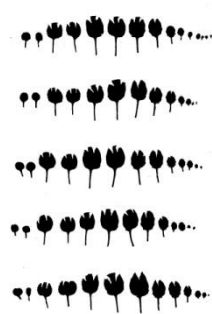

4

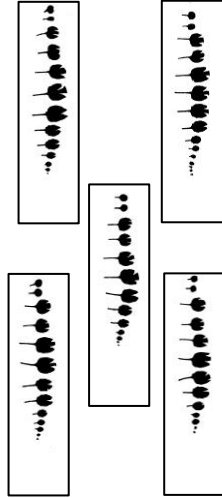

5

|     |                |      |
|-----|----------------|------|
| 101 | RL_ARS_A_17189 | 9810 |
| 102 | RL_ARS_A_17189 | 1000 |
| 103 | RL_ARS_A_17189 | 722  |
| 104 | RL_ARS_A_17189 | 98   |
| 105 | RL_ARS_A_17189 | 1    |
| 106 | RL_ARS_A_17189 | 1    |
| 107 | RL_ARS_A_17189 | 2    |
| 108 | RL_ARS_A_17189 | 1908 |
| 109 | RL_ARS_A_17189 | 222  |
| 110 | RL_ARS_A_17189 | 987  |
| 111 | RL_ARS_A_17189 | 987  |
| 112 | RL_ARS_A_17189 | 987  |
| 113 | RL_ARS_A_17189 | 987  |
| 114 | RL_ARS_A_17189 | 987  |
| 115 | RL_ARS_A_17189 | 987  |
| 116 | RL_ARS_A_17189 | 987  |
| 117 | RL_ARS_A_17189 | 987  |
| 118 | RL_ARS_A_17189 | 987  |
| 119 | RL_ARS_A_17189 | 987  |
| 120 | RL_ARS_A_17189 | 987  |
| 121 | RL_ARS_A_17189 | 987  |
| 122 | RL_ARS_A_17189 | 987  |
| 123 | RL_ARS_A_17189 | 987  |
| 124 | RL_ARS_A_17189 | 987  |
| 125 | RL_ARS_A_17189 | 987  |
| 126 | RL_ARS_A_17189 | 987  |
| 127 | RL_ARS_A_17189 | 987  |
| 128 | RL_ARS_A_17189 | 987  |
| 129 | RL_ARS_A_17189 | 987  |
| 130 | RL_ARS_A_17189 | 987  |
| 131 | RL_ARS_A_17189 | 987  |
| 132 | RL_ARS_A_17189 | 987  |
| 133 | RL_ARS_A_17189 | 987  |
| 134 | RL_ARS_A_17189 | 987  |
| 135 | RL_ARS_A_17189 | 987  |
| 136 | RL_ARS_A_17189 | 987  |
| 137 | RL_ARS_A_17189 | 987  |
| 138 | RL_ARS_A_17189 | 987  |
| 139 | RL_ARS_A_17189 | 987  |
| 140 | RL_ARS_A_17189 | 987  |
| 141 | RL_ARS_A_17189 | 987  |
| 142 | RL_ARS_A_17189 | 987  |
| 143 | RL_ARS_A_17189 | 987  |
| 144 | RL_ARS_A_17189 | 987  |
| 145 | RL_ARS_A_17189 | 987  |
| 146 | RL_ARS_A_17189 | 987  |
| 147 | RL_ARS_A_17189 | 987  |
| 148 | RL_ARS_A_17189 | 987  |
| 149 | RL_ARS_A_17189 | 987  |
| 150 | RL_ARS_A_17189 | 987  |
| 151 | RL_ARS_A_17189 | 987  |
| 152 | RL_ARS_A_17189 | 987  |
| 153 | RL_ARS_A_17189 | 987  |
| 154 | RL_ARS_A_17189 | 987  |
| 155 | RL_ARS_A_17189 | 987  |
| 156 | RL_ARS_A_17189 | 987  |
| 157 | RL_ARS_A_17189 | 987  |
| 158 | RL_ARS_A_17189 | 987  |
| 159 | RL_ARS_A_17189 | 987  |
| 160 | RL_ARS_A_17189 | 987  |
| 161 | RL_ARS_A_17189 | 987  |
| 162 | RL_ARS_A_17189 | 987  |
| 163 | RL_ARS_A_17189 | 987  |
| 164 | RL_ARS_A_17189 | 987  |
| 165 | RL_ARS_A_17189 | 987  |
| 166 | RL_ARS_A_17189 | 987  |
| 167 | RL_ARS_A_17189 | 987  |
| 168 | RL_ARS_A_17189 | 987  |
| 169 | RL_ARS_A_17189 | 987  |
| 170 | RL_ARS_A_17189 | 987  |
| 171 | RL_ARS_A_17189 | 987  |
| 172 | RL_ARS_A_17189 | 987  |
| 173 | RL_ARS_A_17189 | 987  |
| 174 | RL_ARS_A_17189 | 987  |
| 175 | RL_ARS_A_17189 | 987  |
| 176 | RL_ARS_A_17189 | 987  |
| 177 | RL_ARS_A_17189 | 987  |
| 178 | RL_ARS_A_17189 | 987  |
| 179 | RL_ARS_A_17189 | 987  |
| 180 | RL_ARS_A_17189 | 987  |
| 181 | RL_ARS_A_17189 | 987  |
| 182 | RL_ARS_A_17189 | 987  |
| 183 | RL_ARS_A_17189 | 987  |
| 184 | RL_ARS_A_17189 | 987  |
| 185 | RL_ARS_A_17189 | 987  |
| 186 | RL_ARS_A_17189 | 987  |
| 187 | RL_ARS_A_17189 | 987  |
| 188 | RL_ARS_A_17189 | 987  |
| 189 | RL_ARS_A_17189 | 987  |
| 190 | RL_ARS_A_17189 | 987  |
| 191 | RL_ARS_A_17189 | 987  |
| 192 | RL_ARS_A_17189 | 987  |
| 193 | RL_ARS_A_17189 | 987  |
| 194 | RL_ARS_A_17189 | 987  |
| 195 | RL_ARS_A_17189 | 987  |
| 196 | RL_ARS_A_17189 | 987  |
| 197 | RL_ARS_A_17189 | 987  |
| 198 | RL_ARS_A_17189 | 987  |
| 199 | RL_ARS_A_17189 | 987  |
| 200 | RL_ARS_A_17189 | 987  |

6

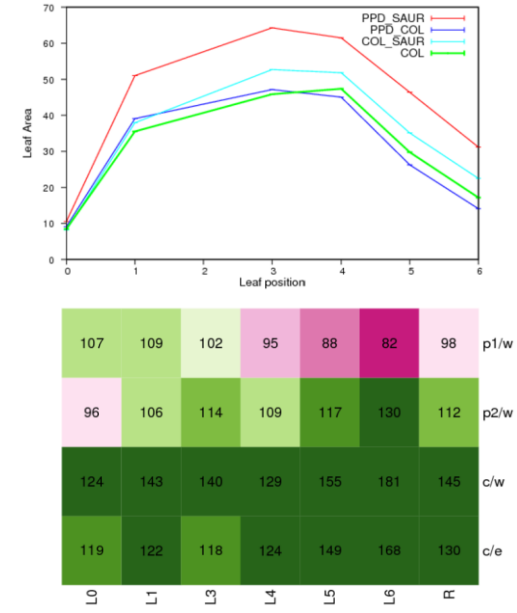

Supplement: supp [file elife_poa_e02252_Figure_1_figure_supplement_3.pdf › elife_poa_e02252_Figure_1_figure_supplement_3.pdf]
