# Supplementary material for: Combining growth-promoting genes leads to positive epistasis in Arabidopsis thaliana
Source: eLife journal article supplement (doi:10.7554/elife.02252), 2014-04-29
Supplement: supp [file elife_poa_e02252_Figure_1_figure_supplement_1.pdf › elife_poa_e02252_Figure_1_figure_supplement_1.pdf]

|                       | AN3 <sup>OE</sup> | ANT <sup>OE</sup> | AVP1 <sup>OE</sup> | BRI1 <sup>OE</sup> | COL | da1-1 | eod1-2 | EXP10 <sup>OE</sup> | GA20OX1 <sup>OE</sup> | GRF5 <sup>OE</sup> | jaw-D | ami-ppd | samba | SAUR19 <sup>OE</sup> |
|-----------------------|-------------------|-------------------|--------------------|--------------------|-----|-------|--------|---------------------|-----------------------|--------------------|-------|---------|-------|----------------------|
| AN3 <sup>OE</sup>     |                   |                   |                    |                    |     |       |        |                     |                       |                    |       |         |       |                      |
| ANT <sup>OE</sup>     |                   |                   |                    |                    |     |       |        |                     |                       |                    |       |         |       |                      |
| AVP1 <sup>OE</sup>    |                   |                   |                    |                    |     |       |        |                     |                       |                    |       |         |       |                      |
| BRI1 <sup>OE</sup>    |                   |                   |                    |                    |     |       |        |                     |                       |                    |       |         |       |                      |
| COL                   |                   |                   |                    |                    |     |       |        |                     |                       |                    |       |         |       |                      |
| da1-1                 |                   |                   |                    |                    |     |       |        |                     |                       |                    |       |         |       | *                    |
| eod1-2                |                   |                   |                    |                    |     |       |        |                     |                       |                    |       |         |       |                      |
| EXP10 <sup>OE</sup>   |                   |                   |                    |                    |     |       |        |                     |                       |                    |       |         |       |                      |
| GA20OX1 <sup>OE</sup> |                   |                   |                    |                    |     |       |        |                     |                       |                    |       |         |       |                      |
| GRF5 <sup>OE</sup>    |                   |                   |                    |                    |     |       |        |                     |                       |                    |       |         |       |                      |
| jaw-D                 |                   |                   |                    |                    |     |       |        |                     |                       |                    |       |         |       |                      |
| ami-ppd               |                   |                   |                    |                    |     |       |        |                     |                       |                    |       |         |       | *                    |
| samba                 |                   |                   |                    |                    |     |       | *      |                     |                       |                    |       |         |       |                      |
| SAUR19 <sup>OE</sup>  |                   |                   |                    |                    |     |       |        |                     |                       |                    |       |         |       |                      |

|   |                               |
|---|-------------------------------|
|   | Heterozygous cross            |
|   | Heterozygous control          |
|   | Single homozygous             |
|   | Reciprocal heterozygous cross |
| * | Homozygous cross              |
