# Supplementary material for: Combining growth-promoting genes leads to positive epistasis in Arabidopsis thaliana
Source: eLife journal article supplement (doi:10.7554/elife.02252), 2014-04-29

AN3 x BRI1

(a) Least Square Means Area

|     |     |     |     |     |     |          |      |
|-----|-----|-----|-----|-----|-----|----------|------|
| 114 | 99  | 105 | 107 | 103 | 105 | 103      | p1/w |
| 112 | 104 | 101 | 100 | 104 | 121 | 107      | p2/w |
| 115 | 105 | 103 | 102 | 94  | 106 | 105      | c/w  |
| 89  | 101 | 96  | 95  | 87  | 82  | 94       | c/e  |
| L0  | L1  | L3  | L4  | L5  | L6  | $\alpha$ |      |

(b) Adjusted p-value

|        |        |        |        |        |        |          |       |
|--------|--------|--------|--------|--------|--------|----------|-------|
| 8e-04  | 0.7647 | 0.0602 | 0.011  | 0.5899 | 0.3215 | 0.1015   | p1-wt |
| 0.0061 | 0.0602 | 0.5899 | 0.9661 | 0.4146 | 1e-04  | 8e-04    | p2-wt |
| 1e-04  | 0.0075 | 0.1459 | 0.2627 | 0.2362 | 0.1544 | 0.0113   | c-wt  |
| 0.1141 | 0.7048 | 0.4624 | 0.3268 | 0.1288 | 0.0203 | 0.5965   | add   |
| L0     | L1     | L3     | L4     | L5     | L6     | $\alpha$ |       |

(c) Leaf series combination and controls

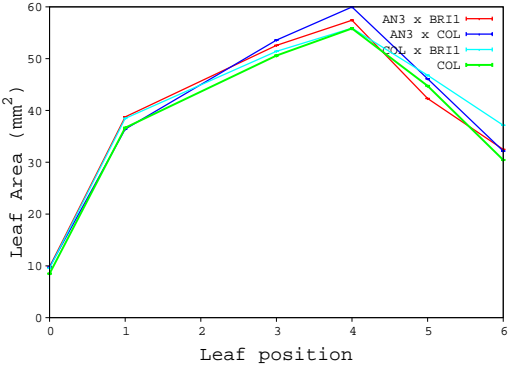

(d) Leaf area combination vs expected

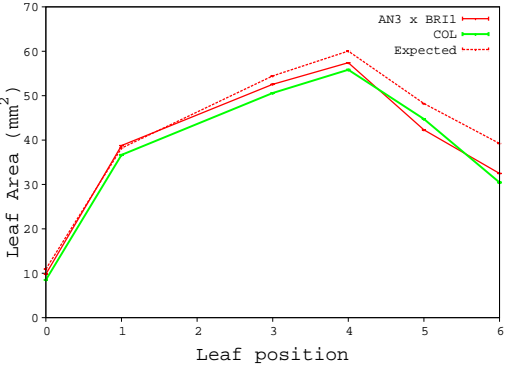

Supplement: supp [file elife_poa_e02252_Figure_1_figure_supplement_6.pdf › elife_poa_e02252_Figure_1_figure_supplement_6.pdf]
