# Supplementary material for: Combining growth-promoting genes leads to positive epistasis in Arabidopsis thaliana
Source: eLife journal article supplement (doi:10.7554/elife.02252), 2014-04-29

AN3 x DA1

(a) Least Square Means Area

|     |     |     |     |     |     |          |      |
|-----|-----|-----|-----|-----|-----|----------|------|
| 114 | 99  | 105 | 107 | 102 | 105 | 103      | p1/w |
| 98  | 111 | 109 | 110 | 100 | 94  | 104      | p2/w |
| 126 | 109 | 111 | 110 | 94  | 83  | 102      | c/w  |
| 112 | 98  | 95  | 93  | 91  | 83  | 94       | c/e  |
| L0  | L1  | L3  | L4  | L5  | L6  | $\alpha$ |      |

(b) Adjusted p-value

|        |        |        |        |        |        |          |       |
|--------|--------|--------|--------|--------|--------|----------|-------|
| 2e-04  | 0.7626 | 0.041  | 0.0055 | 0.4219 | 0.3254 | 0.2619   | p1-wt |
| 0.7164 | 1e-04  | 6e-04  | 2e-04  | 0.8995 | 0.3309 | 0.2619   | p2-wt |
| 1e-04  | 1e-04  | 1e-04  | 1e-04  | 0.05   | 1e-04  | 0.3179   | c-wt  |
| 0.0518 | 0.7857 | 0.3332 | 0.0964 | 0.0964 | 0.0264 | 0.6078   | add   |
| L0     | L1     | L3     | L4     | L5     | L6     | $\alpha$ |       |

(c) Leaf series combination and controls

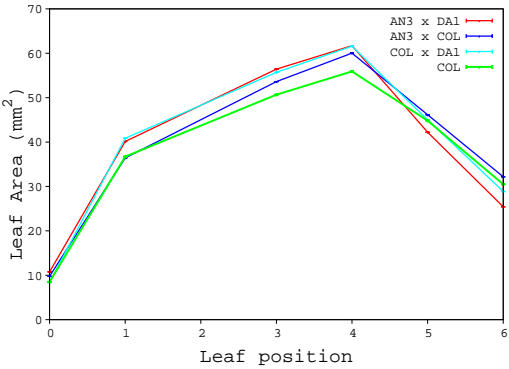

(d) Leaf area combination vs expected

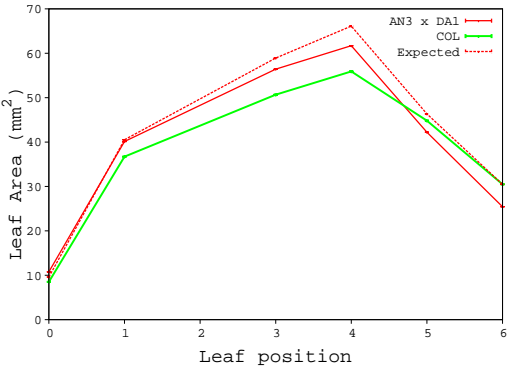

Supplement: supp [file elife_poa_e02252_Figure_1_figure_supplement_7.pdf › elife_poa_e02252_Figure_1_figure_supplement_7.pdf]
