# Supplementary material for: Combining growth-promoting genes leads to positive epistasis in Arabidopsis thaliana
Source: eLife journal article supplement (doi:10.7554/elife.02252), 2014-04-29

AN3 x EOD

(a) Least Square Means Area

|     |     |     |     |     |     |     |      |
|-----|-----|-----|-----|-----|-----|-----|------|
| 114 | 99  | 106 | 107 | 103 | 105 | 104 | p1/w |
| 82  | 91  | 102 | 95  | 94  | 93  | 93  | p2/w |
| 125 | 103 | 109 | 104 | 102 | 103 | 106 | c/w  |
| 132 | 112 | 100 | 101 | 104 | 104 | 108 | c/e  |
| L0  | L1  | L3  | L4  | L5  | L6  | α   |      |

(b) Adjusted p-value

|       |        |        |        |        |        |        |       |
|-------|--------|--------|--------|--------|--------|--------|-------|
| 2e-04 | 0.8531 | 0.031  | 0.0046 | 0.4196 | 0.3374 | 0.029  | p1-wt |
| 1e-04 | 6e-04  | 0.4597 | 0.1446 | 0.1446 | 0.3374 | 0.0034 | p2-wt |
| 1e-04 | 0.2044 | 2e-04  | 0.0967 | 0.5356 | 0.4597 | 0.0034 | c-wt  |
| 1e-04 | 0.0016 | 0.8588 | 0.7043 | 0.4597 | 0.6212 | 0.5807 | add   |
| L0    | L1     | L3     | L4     | L5     | L6     | α      |       |

(c) Leaf series combination and controls

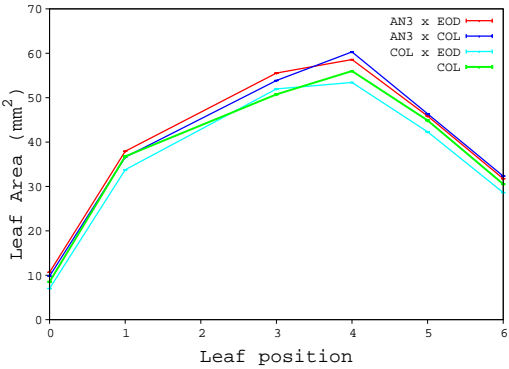

(d) Leaf area combination vs expected

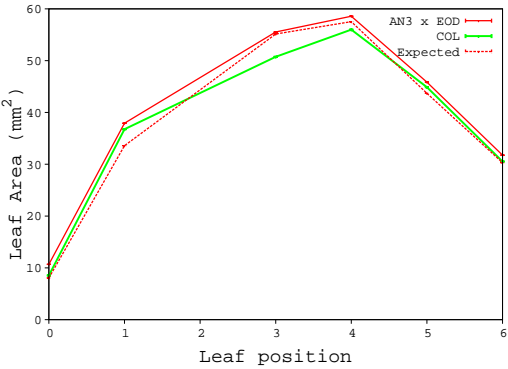

Supplement: supp [file elife_poa_e02252_Figure_1_figure_supplement_8.pdf › elife_poa_e02252_Figure_1_figure_supplement_8.pdf]
