# Supplementary material for: Combining growth-promoting genes leads to positive epistasis in Arabidopsis thaliana
Source: eLife journal article supplement (doi:10.7554/elife.02252), 2014-04-29

AN3 x GRF5

(a) Least Square Means Area

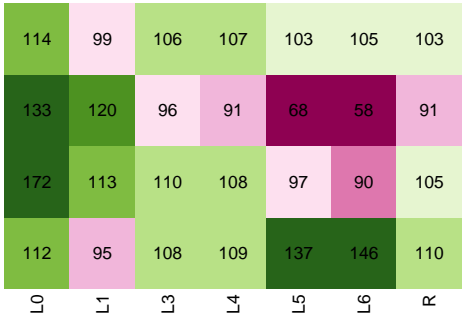

(b) Adjusted p-value

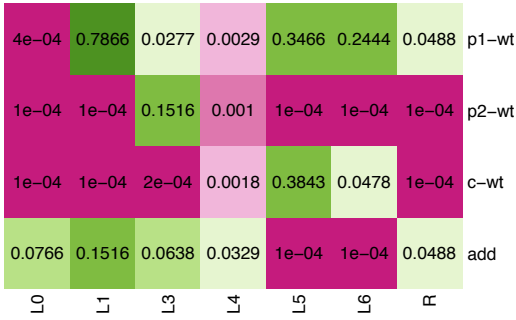

(c) Leaf series combination and controls

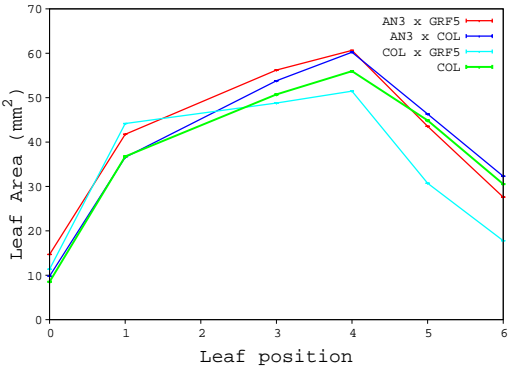

(d) Leaf area combination vs expected

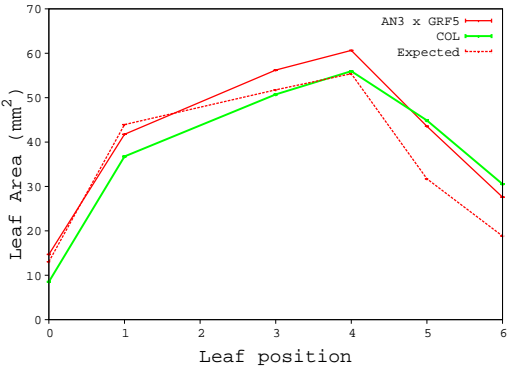

Supplement: supp [file elife_poa_e02252_Figure_1_figure_supplement_11.pdf › elife_poa_e02252_Figure_1_figure_supplement_11.pdf]
