# Supplementary material for: Combining growth-promoting genes leads to positive epistasis in Arabidopsis thaliana
Source: eLife journal article supplement (doi:10.7554/elife.02252), 2014-04-29

# AN3 x SAUR

(a) Least Square Means Area

|     |     |     |     |     |     |     |          |
|-----|-----|-----|-----|-----|-----|-----|----------|
| 114 | 99  | 105 | 107 | 103 | 105 | 104 | p1/w     |
| 91  | 101 | 106 | 99  | 100 | 108 | 103 | p2/w     |
| 115 | 98  | 110 | 106 | 105 | 113 | 106 | c/w      |
| 110 | 97  | 98  | 99  | 101 | 98  | 99  | c/e      |
| L0  | L1  | L2  | L3  | L4  | L5  | L6  | $\alpha$ |

(b) Adjusted p-value

|        |        |        |        |        |        |        |          |
|--------|--------|--------|--------|--------|--------|--------|----------|
| 3e-04  | 0.7963 | 0.054  | 0.008  | 0.524  | 0.3741 | 0.0922 | p1-wt    |
| 0.0123 | 0.6281 | 0.0219 | 0.7963 | 0.7963 | 0.0647 | 0.0922 | p2-wt    |
| 1e-04  | 0.3741 | 1e-04  | 0.0019 | 0.0369 | 9e-04  | 1e-04  | c-wt     |
| 0.089  | 0.5809 | 0.7963 | 0.9946 | 0.7963 | 0.8983 | 0.2987 | add      |
| L0     | L1     | L2     | L3     | L4     | L5     | L6     | $\alpha$ |

(c) Leaf series combination and controls

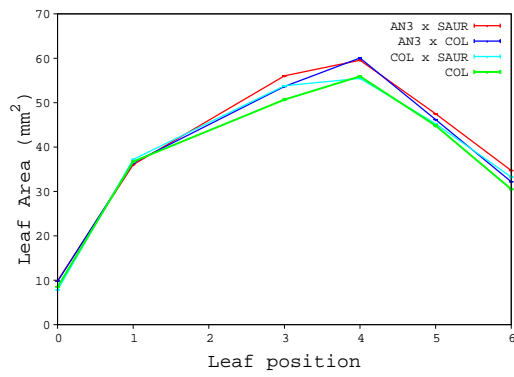

(d) Leaf area combination vs expected

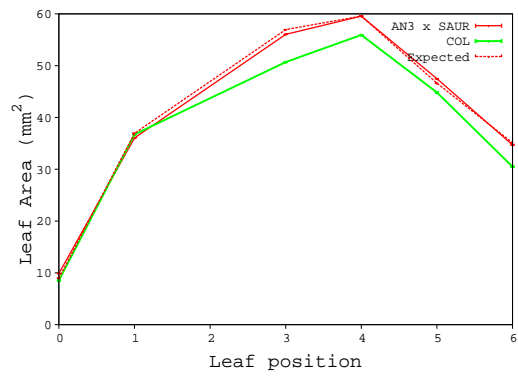

Supplement: supp [file elife_poa_e02252_Figure_1_figure_supplement_14.pdf › elife_poa_e02252_Figure_1_figure_supplement_14.pdf]
