# Supplementary material for: Combining growth-promoting genes leads to positive epistasis in Arabidopsis thaliana
Source: eLife journal article supplement (doi:10.7554/elife.02252), 2014-04-29

AVP1 x BRI1

(a) Least Square Means Area

|     |     |     |     |     |     |          |      |
|-----|-----|-----|-----|-----|-----|----------|------|
| 94  | 102 | 114 | 114 | 113 | 110 | 107      | p1/w |
| 112 | 104 | 101 | 100 | 104 | 122 | 105      | p2/w |
| 102 | 98  | 119 | 124 | 126 | 143 | 117      | c/w  |
| 96  | 91  | 102 | 108 | 106 | 106 | 103      | c/e  |
| L0  | L1  | L3  | L4  | L5  | L6  | $\alpha$ |      |

(b) Adjusted p-value

|        |        |        |        |        |        |          |       |
|--------|--------|--------|--------|--------|--------|----------|-------|
| 0.1471 | 0.2101 | 1e-04  | 1e-04  | 1e-04  | 0.038  | 2e-04    | p1-wt |
| 0.0015 | 0.0222 | 0.5457 | 0.9264 | 0.1768 | 1e-04  | 5e-04    | p2-wt |
| 0.5457 | 0.5058 | 1e-04  | 1e-04  | 1e-04  | 1e-04  | 1e-04    | c-wt  |
| 0.5457 | 0.006  | 0.5838 | 0.0423 | 0.23   | 0.5053 | 9e-04    | add   |
| L0     | L1     | L3     | L4     | L5     | L6     | $\alpha$ |       |

(c) Leaf series combination and controls

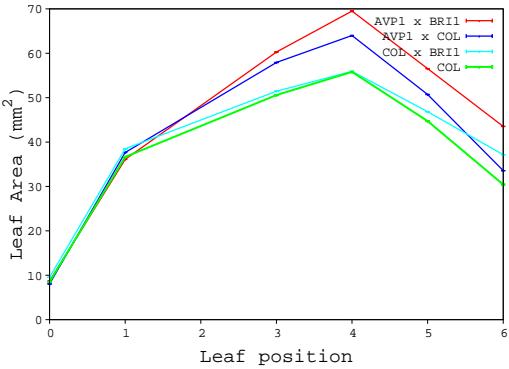

(d) Leaf area combination vs expected

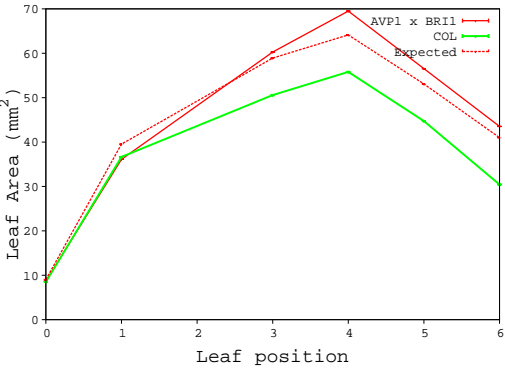

Supplement: supp [file elife_poa_e02252_Figure_1_figure_supplement_23.pdf › elife_poa_e02252_Figure_1_figure_supplement_23.pdf]
