# Supplementary material for: Combining growth-promoting genes leads to positive epistasis in Arabidopsis thaliana
Source: eLife journal article supplement (doi:10.7554/elife.02252), 2014-04-29

# AVP1 x EOD

(a) Least Square Means Area

|     |     |     |     |     |     |          |      |
|-----|-----|-----|-----|-----|-----|----------|------|
| 94  | 102 | 114 | 114 | 113 | 110 | 107      | p1/w |
| 82  | 91  | 102 | 95  | 94  | 93  | 93       | p2/w |
| 97  | 95  | 117 | 126 | 118 | 106 | 107      | c/w  |
| 125 | 101 | 100 | 116 | 111 | 103 | 107      | c/e  |
| L0  | L1  | L3  | L4  | L5  | L6  | $\alpha$ |      |

(b) Adjusted p-value

|        |        |        |        |        |        |          |       |
|--------|--------|--------|--------|--------|--------|----------|-------|
| 0.101  | 0.2362 | 1e-04  | 1e-04  | 1e-04  | 0.0537 | 2e-04    | p1-wt |
| 1e-04  | 2e-04  | 0.4478 | 0.0855 | 0.0909 | 0.249  | 0.0022   | p2-wt |
| 0.4478 | 0.0129 | 1e-04  | 1e-04  | 1e-04  | 0.1813 | 1e-04    | c-wt  |
| 1e-04  | 0.7548 | 0.8878 | 1e-04  | 0.0462 | 0.7435 | 0.92     | add   |
| L0     | L1     | L3     | L4     | L5     | L6     | $\alpha$ |       |

(c) Leaf series combination and controls

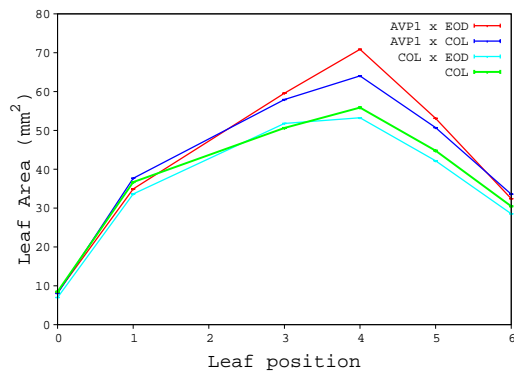

(d) Leaf area combination vs expected

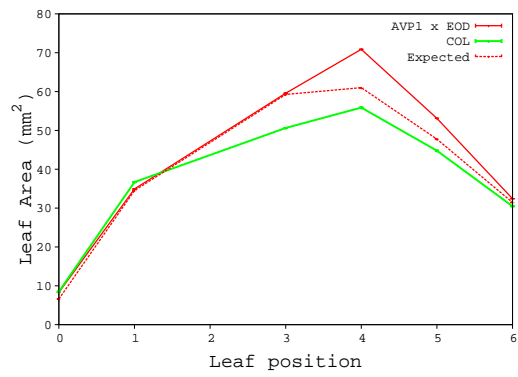

Supplement: supp [file elife_poa_e02252_Figure_1_figure_supplement_25.pdf › elife_poa_e02252_Figure_1_figure_supplement_25.pdf]
