# Supplementary material for: Combining growth-promoting genes leads to positive epistasis in Arabidopsis thaliana
Source: eLife journal article supplement (doi:10.7554/elife.02252), 2014-04-29

AVP1 x EXP10

(a) Least Square Means Area

|     |     |     |     |     |     |     |          |
|-----|-----|-----|-----|-----|-----|-----|----------|
| 94  | 102 | 114 | 114 | 113 | 110 | 106 | p1/w     |
| 82  | 87  | 97  | 98  | 100 | 104 | 96  | p2/w     |
| 95  | 95  | 119 | 123 | 129 | 131 | 113 | c/w      |
| 121 | 106 | 106 | 109 | 113 | 114 | 109 | c/e      |
| L0  | L1  | L2  | L3  | L4  | L5  | L6  | $\alpha$ |

(b) Adjusted p-value

|        |        |        |        |        |        |        |          |
|--------|--------|--------|--------|--------|--------|--------|----------|
| 0.101  | 0.1842 | 1e-04  | 1e-04  | 1e-04  | 0.0367 | 1e-04  | p1-wt    |
| 1e-04  | 1e-04  | 0.3899 | 0.4446 | 0.9384 | 0.3325 | 0.1226 | p2-wt    |
| 0.1262 | 0.0098 | 1e-04  | 1e-04  | 1e-04  | 1e-04  | 1e-04  | c-wt     |
| 3e-04  | 0.0571 | 0.1202 | 0.0143 | 0.0073 | 0.072  | 0.0187 | add      |
| L0     | L1     | L2     | L3     | L4     | L5     | L6     | $\alpha$ |

(c) Leaf series combination and controls

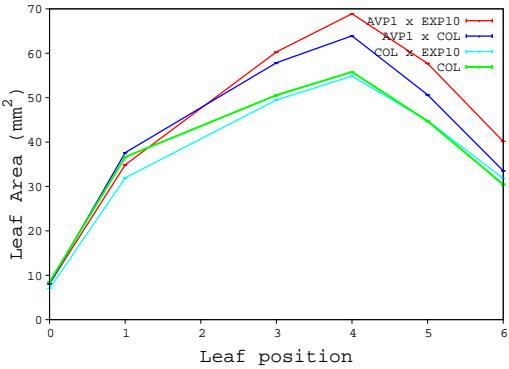

(d) Leaf area combination vs expected

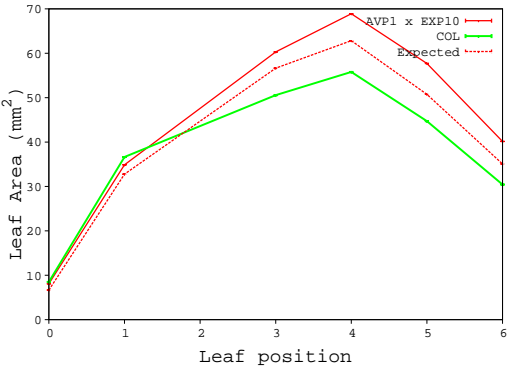

Supplement: supp [file elife_poa_e02252_Figure_1_figure_supplement_26.pdf › elife_poa_e02252_Figure_1_figure_supplement_26.pdf]
