# Supplementary material for: Combining growth-promoting genes leads to positive epistasis in Arabidopsis thaliana
Source: eLife journal article supplement (doi:10.7554/elife.02252), 2014-04-29

# DA1 x SAUR

(a) Least Square Means Area

|     |     |     |     |     |     |     |          |
|-----|-----|-----|-----|-----|-----|-----|----------|
| 147 | 131 | 122 | 121 | 121 | 134 | 131 | p1/w     |
| 91  | 101 | 106 | 99  | 100 | 108 | 103 | p2/w     |
| 121 | 126 | 127 | 116 | 124 | 134 | 128 | c/w      |
| 89  | 95  | 97  | 97  | 101 | 91  | 94  | c/e      |
| L0  | L1  | L2  | L3  | L4  | L5  | L6  | $\alpha$ |

(b) Adjusted p-value

|        |        |        |        |        |        |        |          |
|--------|--------|--------|--------|--------|--------|--------|----------|
| 1e-04  | p1-wt    |
| 0.0066 | 0.5376 | 0.014  | 0.7519 | 0.7519 | 0.0468 | 0.0684 | p2-wt    |
| 1e-04  | c-wt     |
| 0.0606 | 0.1658 | 0.5992 | 0.5376 | 0.7892 | 0.2586 | 0.3922 | add      |
| L0     | L1     | L2     | L3     | L4     | L5     | L6     | $\alpha$ |

(c) Leaf series combination and controls

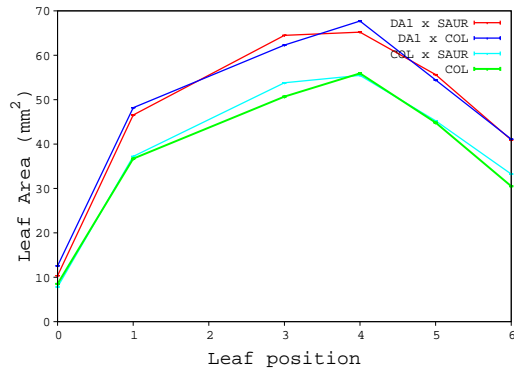

(d) Leaf area combination vs expected

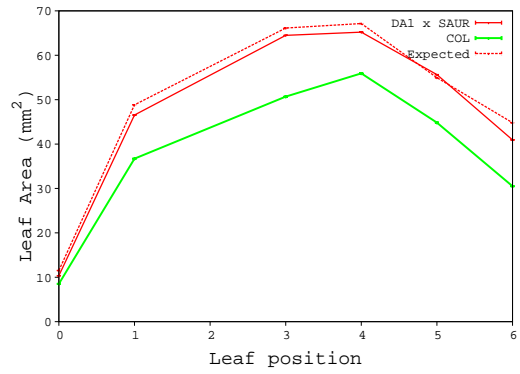

Supplement: supp [file elife_poa_e02252_Figure_1_figure_supplement_40.pdf › elife_poa_e02252_Figure_1_figure_supplement_40.pdf]
