# Supplementary material for: Combining growth-promoting genes leads to positive epistasis in Arabidopsis thaliana
Source: eLife journal article supplement (doi:10.7554/elife.02252), 2014-04-29

EXP10 x JAW

(a) Least Square Means Area

|     |     |    |     |     |     |     |      |
|-----|-----|----|-----|-----|-----|-----|------|
| 101 | 94  | 98 | 102 | 110 | 115 | 105 | p1/w |
| 76  | 117 | 89 | 78  | 52  | 38  | 76  | p2/w |
| 59  | 90  | 76 | 63  | 40  | 26  | 60  | c/w  |
| 76  | 81  | 86 | 79  | 69  | 61  | 74  | c/e  |
| L0  | L1  | L3 | L4  | L5  | L6  | α   |      |

(b) Adjusted p-value

|        |        |        |       |        |        |        |       |
|--------|--------|--------|-------|--------|--------|--------|-------|
| 0.7316 | 0.0043 | 0.6943 | 0.449 | 0.0098 | 0.0074 | 0.0171 | p1-wt |
| 1e-04  | 1e-04  | 1e-04  | 1e-04 | 1e-04  | 1e-04  | 1e-04  | p2-wt |
| 1e-04  | 1e-04  | 1e-04  | 1e-04 | 1e-04  | 1e-04  | 1e-04  | c-wt  |
| 1e-04  | 1e-04  | 0.0011 | 1e-04 | 1e-04  | 1e-04  | 1e-04  | add   |
| L0     | L1     | L3     | L4    | L5     | L6     | α      |       |

(c) Leaf series combination and controls

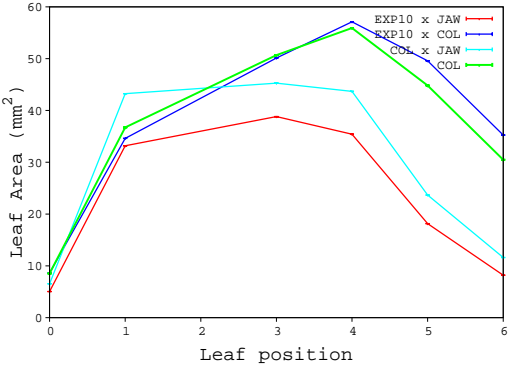

(d) Leaf area combination vs expected

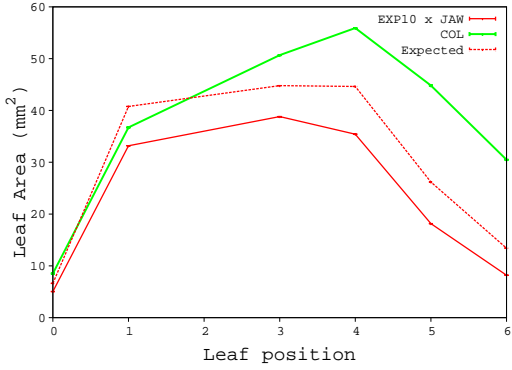

Supplement: supp [file elife_poa_e02252_Figure_1_figure_supplement_43.pdf › elife_poa_e02252_Figure_1_figure_supplement_43.pdf]
