# Supplementary material for: Combining growth-promoting genes leads to positive epistasis in Arabidopsis thaliana
Source: eLife journal article supplement (doi:10.7554/elife.02252), 2014-04-29

EXP10 x SAUR

(a) Least Square Means Area

|     |     |     |     |     |     |     |          |
|-----|-----|-----|-----|-----|-----|-----|----------|
| 101 | 94  | 99  | 102 | 110 | 115 | 105 | p1/w     |
| 91  | 101 | 106 | 99  | 101 | 109 | 104 | p2/w     |
| 87  | 96  | 106 | 105 | 115 | 129 | 110 | c/w      |
| 93  | 100 | 101 | 103 | 103 | 102 | 100 | c/e      |
| L0  | L1  | L2  | L3  | L4  | L5  | L6  | $\alpha$ |

(b) Adjusted p-value

|        |        |        |        |        |        |        |          |
|--------|--------|--------|--------|--------|--------|--------|----------|
| 0.7591 | 0.0081 | 0.7591 | 0.4907 | 0.001  | 0.001  | 0.0121 | p1-wt    |
| 0.014  | 0.6237 | 0.0222 | 0.7591 | 0.7591 | 0.0459 | 0.0365 | p2-wt    |
| 8e-04  | 0.0992 | 0.0356 | 0.0679 | 1e-04  | 1e-04  | 1e-04  | c-wt     |
| 0.3842 | 0.9278 | 0.7591 | 0.4992 | 0.706  | 0.7591 | 0.0872 | add      |
| L0     | L1     | L2     | L3     | L4     | L5     | L6     | $\alpha$ |

(c) Leaf series combination and controls

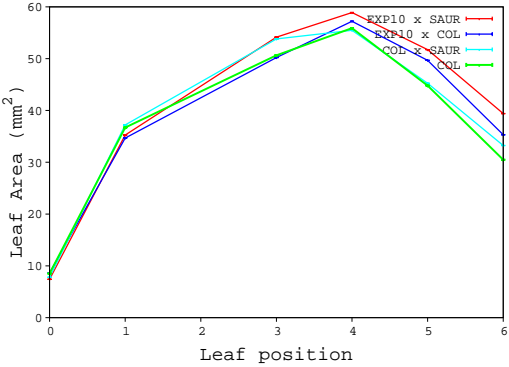

(d) Leaf area combination vs expected

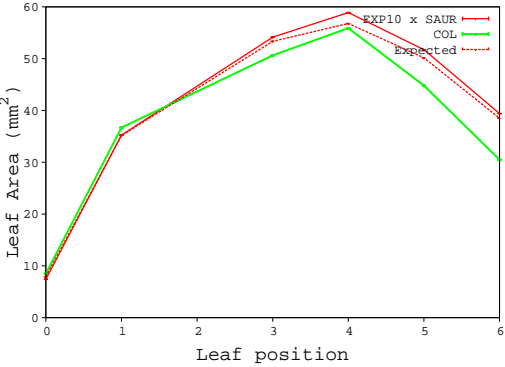

Supplement: supp [file elife_poa_e02252_Figure_1_figure_supplement_45.pdf › elife_poa_e02252_Figure_1_figure_supplement_45.pdf]
