# Supplementary material for: Combining growth-promoting genes leads to positive epistasis in Arabidopsis thaliana
Source: eLife journal article supplement (doi:10.7554/elife.02252), 2014-04-29

# GA200X x SAUR

(a) Least Square Means Area

|     |     |     |     |     |     |     |          |
|-----|-----|-----|-----|-----|-----|-----|----------|
| 104 | 107 | 114 | 116 | 126 | 144 | 113 | p1/w     |
| 91  | 101 | 106 | 99  | 100 | 108 | 103 | p2/w     |
| 93  | 103 | 112 | 111 | 121 | 138 | 120 | c/w      |
| 97  | 95  | 92  | 97  | 95  | 88  | 102 | c/e      |
| L0  | L1  | L2  | L3  | L4  | L5  | L6  | $\alpha$ |

(b) Adjusted p-value

|        |        |        |        |        |        |        |          |
|--------|--------|--------|--------|--------|--------|--------|----------|
| 0.3116 | 0.0088 | 2e-04  | 1e-04  | 1e-04  | 1e-04  | 1e-04  | p1-wt    |
| 0.0088 | 0.5651 | 0.038  | 0.7547 | 0.7547 | 0.0554 | 0.0868 | p2-wt    |
| 0.0373 | 0.0569 | 1e-04  | 1e-04  | 1e-04  | 1e-04  | 1e-04  | c-wt     |
| 0.6483 | 0.2462 | 0.1685 | 0.5809 | 0.4527 | 0.1302 | 0.8556 | add      |
| L0     | L1     | L2     | L3     | L4     | L5     | L6     | $\alpha$ |

(c) Leaf series combination and controls

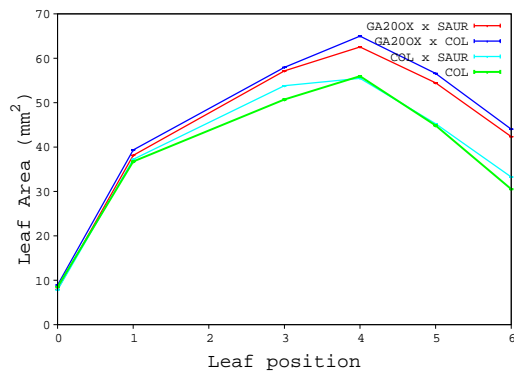

(d) Leaf area combination vs expected

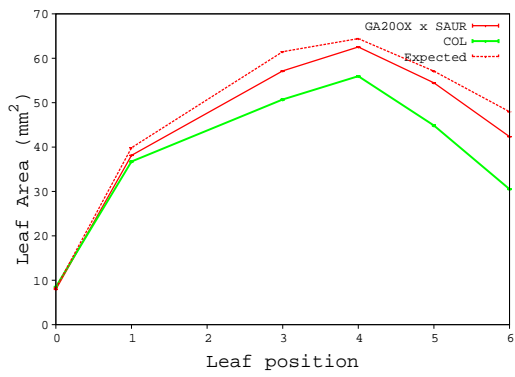

Supplement: supp [file elife_poa_e02252_Figure_1_figure_supplement_49.pdf › elife_poa_e02252_Figure_1_figure_supplement_49.pdf]
