# Supplementary material for: Combining growth-promoting genes leads to positive epistasis in Arabidopsis thaliana
Source: eLife journal article supplement (doi:10.7554/elife.02252), 2014-04-29

JAW x SAUR

(a) Least Square Means Area

|     |     |     |     |     |     |     |          |
|-----|-----|-----|-----|-----|-----|-----|----------|
| 75  | 101 | 81  | 73  | 54  | 34  | 70  | p1/w     |
| 91  | 101 | 106 | 99  | 100 | 108 | 103 | p2/w     |
| 77  | 115 | 94  | 78  | 59  | 55  | 82  | c/w      |
| 112 | 112 | 109 | 108 | 108 | 146 | 110 | c/e      |
| L0  | L1  | L2  | L3  | L4  | L5  | L6  | $\alpha$ |

(b) Adjusted p-value

|        |        |        |        |        |        |        |          |
|--------|--------|--------|--------|--------|--------|--------|----------|
| 1e-04  | 0.5685 | 1e-04  | 1e-04  | 1e-04  | 1e-04  | 1e-04  | p1-wt    |
| 0.0153 | 0.652  | 0.0371 | 0.7793 | 0.8228 | 0.1403 | 0.0975 | p2-wt    |
| 1e-04  | 1e-04  | 0.0834 | 1e-04  | 1e-04  | 1e-04  | 1e-04  | c-wt     |
| 0.0668 | 0.0111 | 0.0735 | 0.1191 | 0.274  | 1e-04  | 1e-04  | add      |
| L0     | L1     | L2     | L3     | L4     | L5     | L6     | $\alpha$ |

(c) Leaf series combination and controls

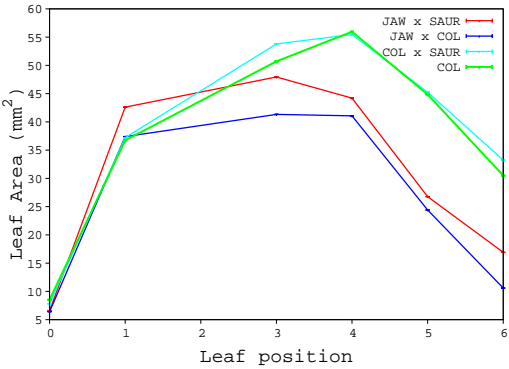

(d) Leaf area combination vs expected

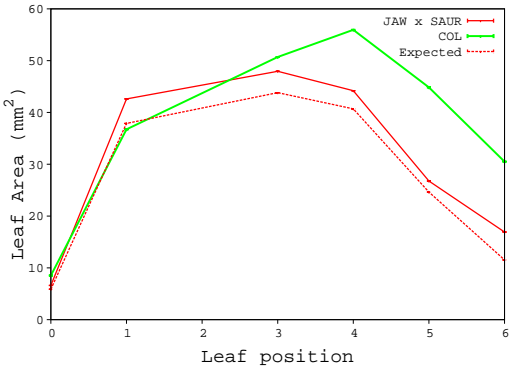

Supplement: supp [file elife_poa_e02252_Figure_1_figure_supplement_54.pdf › elife_poa_e02252_Figure_1_figure_supplement_54.pdf]
