# Supplementary material for: Combining growth-promoting genes leads to positive epistasis in Arabidopsis thaliana
Source: eLife journal article supplement (doi:10.7554/elife.02252), 2014-04-29

# SAMBA x ANT

(a) Least Square Means Area

|     |     |     |     |     |     |     |          |
|-----|-----|-----|-----|-----|-----|-----|----------|
| 112 | 99  | 97  | 94  | 102 | 103 | 103 | p1/w     |
| 103 | 94  | 96  | 101 | 104 | 118 | 103 | p2/w     |
| 123 | 108 | 107 | 114 | 115 | 135 | 119 | c/w      |
| 106 | 116 | 113 | 120 | 108 | 109 | 111 | c/e      |
| L0  | L1  | L2  | L3  | L4  | L5  | L6  | $\alpha$ |

(b) Adjusted p-value

|        |        |        |        |        |        |        |          |
|--------|--------|--------|--------|--------|--------|--------|----------|
| 8e-04  | 0.7318 | 0.3648 | 0.0211 | 0.4437 | 0.4437 | 0.0851 | p1-wt    |
| 0.3384 | 0.0039 | 0.225  | 0.6101 | 0.2424 | 1e-04  | 0.0622 | p2-wt    |
| 1e-04  | 1e-04  | 0.0173 | 1e-04  | 1e-04  | 1e-04  | 1e-04  | c-wt     |
| 0.3384 | 1e-04  | 0.0039 | 1e-04  | 0.1503 | 0.2557 | 1e-04  | add      |
| L0     | L1     | L2     | L3     | L4     | L5     | L6     | $\alpha$ |

(c) Leaf series combination and controls

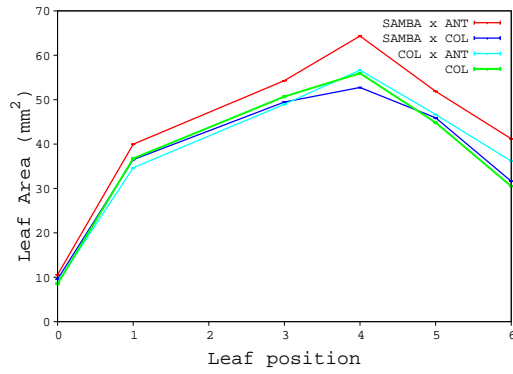

(d) Leaf area combination vs expected

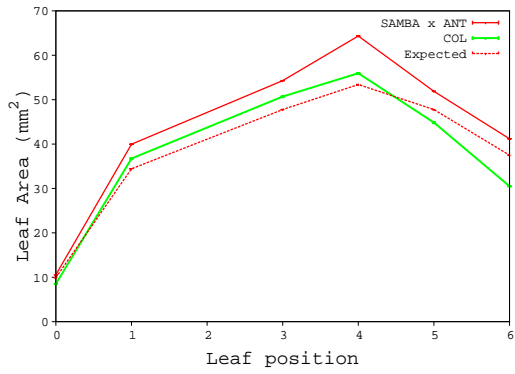

Supplement: supp [file elife_poa_e02252_Figure_1_figure_supplement_57.pdf › elife_poa_e02252_Figure_1_figure_supplement_57.pdf]
