# Supplementary material for: Combining growth-promoting genes leads to positive epistasis in Arabidopsis thaliana
Source: eLife journal article supplement (doi:10.7554/elife.02252), 2014-04-29

# SAMBA x PPD

(a) Least Square Means Area

|     |     |     |     |     |     |     |          |
|-----|-----|-----|-----|-----|-----|-----|----------|
| 112 | 99  | 97  | 94  | 102 | 103 | 103 | p1/w     |
| 105 | 113 | 111 | 115 | 109 | 105 | 112 | p2/w     |
| 113 | 107 | 101 | 100 | 93  | 99  | 102 | c/w      |
| 95  | 94  | 93  | 91  | 83  | 90  | 88  | c/e      |
| L0  | L1  | L2  | L3  | L4  | L5  | L6  | $\alpha$ |

(b) Adjusted p-value

|        |        |        |        |        |        |        |          |
|--------|--------|--------|--------|--------|--------|--------|----------|
| 0.0025 | 0.8784 | 0.4759 | 0.0607 | 0.5115 | 0.5245 | 0.1904 | p1-wt    |
| 0.2587 | 1e-04  | 3e-04  | 1e-04  | 0.0201 | 0.4027 | 1e-04  | p2-wt    |
| 0.0114 | 0.0256 | 0.6758 | 0.9382 | 0.1757 | 0.9382 | 0.4177 | c-wt     |
| 0.5428 | 0.285  | 0.231  | 0.1468 | 0.005  | 0.3926 | 0.8118 | add      |
| L0     | L1     | L2     | L3     | L4     | L5     | L6     | $\alpha$ |

(c) Leaf series combination and controls

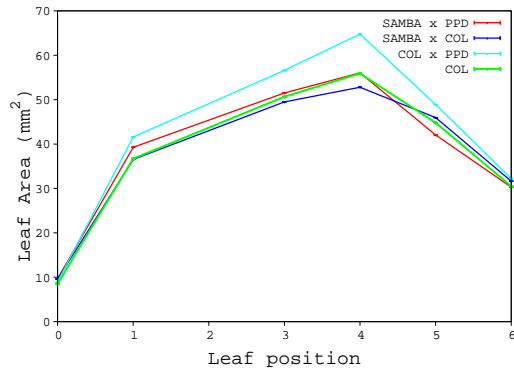

(d) Leaf area combination vs expected

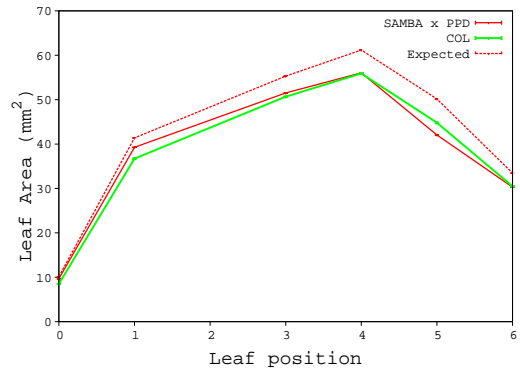

Supplement: supp [file elife_poa_e02252_Figure_1_figure_supplement_63.pdf › elife_poa_e02252_Figure_1_figure_supplement_63.pdf]
