# Supplementary material for: Combining growth-promoting genes leads to positive epistasis in Arabidopsis thaliana
Source: eLife journal article supplement (doi:10.7554/elife.02252), 2014-04-29

# SAMBA x SAUR

(a) Least Square Means Area

|     |     |     |     |     |     |     |          |
|-----|-----|-----|-----|-----|-----|-----|----------|
| 112 | 99  | 97  | 94  | 102 | 103 | 103 | p1/w     |
| 91  | 101 | 106 | 99  | 101 | 109 | 103 | p2/w     |
| 133 | 110 | 113 | 115 | 114 | 133 | 120 | c/w      |
| 129 | 108 | 108 | 123 | 110 | 117 | 112 | c/e      |
| L0  | L1  | L2  | L3  | L4  | L5  | L6  | $\alpha$ |

(b) Adjusted p-value

|        |        |        |        |        |        |        |          |
|--------|--------|--------|--------|--------|--------|--------|----------|
| 4e-04  | 0.8433 | 0.4357 | 0.0281 | 0.4357 | 0.4357 | 0.1006 | p1-wt    |
| 0.0067 | 0.4763 | 0.0124 | 0.7581 | 0.7556 | 0.0312 | 0.0385 | p2-wt    |
| 1e-04  | c-wt     |
| 1e-04  | 0.0071 | 0.0312 | 1e-04  | 0.0312 | 0.0198 | 1e-04  | add      |
| L0     | L1     | L2     | L3     | L4     | L5     | L6     | $\alpha$ |

(c) Leaf series combination and controls

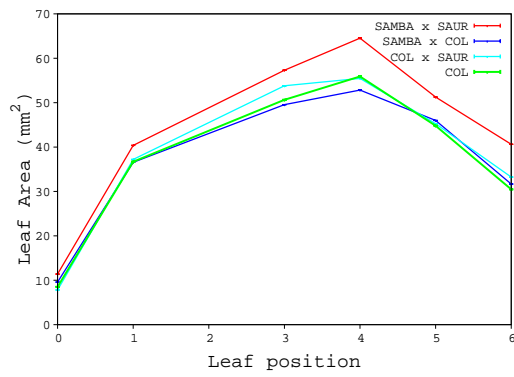

(d) Leaf area combination vs expected

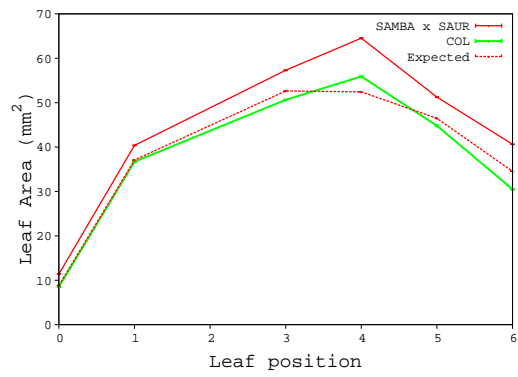

Supplement: supp [file elife_poa_e02252_Figure_1_figure_supplement_64.pdf › elife_poa_e02252_Figure_1_figure_supplement_64.pdf]
