# Supplementary material for: Combining growth-promoting genes leads to positive epistasis in Arabidopsis thaliana
Source: eLife journal article supplement (doi:10.7554/elife.02252), 2014-04-29
Supplement: supp [file elife_poa_e02252_Supplementary_File_1.pdf › elife_poa_e02252_Supplementary_File_1.pdf]

| Line        | % to<br>parA | % to<br>parB | Pcross-<br>parA | Pcross-<br>parB |
|-------------|--------------|--------------|-----------------|-----------------|
| AN3_ANT     | 103          | 104          | 1,80E-01        | 1,70E-01        |
| AN3_AVP1    | 114          | 100          | 1,00E-04        | 8,60E-01        |
| AN3_BRI1    | 101          | 98           | 6,00E-01        | 3,10E-01        |
| AN3_DA1     | 99           | 98           | 6,10E-01        | 6,60E-01        |
| AN3_EOD     | 101          | 114          | 5,80E-01        | 1,00E-04        |
| AN3_EXP10   | 104          | 112          | 1,40E-01        | 4,00E-04        |
| AN3_GA20OX  | 114          | 112          | 1,00E-04        | 1,00E-04        |
| AN3_GRF5    | 101          | 115          | 4,90E-02        | 1,00E-04        |
| AN3_JAW     | 71           | 98           | 1,00E-04        | 3,80E-01        |
| AN3_PPD     | 101          | 93           | 7,50E-01        | 1,50E-02        |
| AN3_SAUR    | 103          | 103          | 3,00E-01        | 2,60E-01        |
| ANT_AVP1    | 119          | 113          | 1,00E-04        | 1,00E-04        |
| ANT_BRI1    | 107          | 113          | 1,00E-01        | 2,00E-04        |
| ANT_DA1     | 95           | 105          | 3,00E-01        | 7,90E-01        |
| ANT_EOD     | 108          | 129          | 4,90E-02        | 1,00E-04        |
| ANT_EXP10   | 101          | 118          | 8,00E-01        | 1,00E-04        |
| ANT_GRF5    | 94           | 117          | 4,70E-01        | 1,00E-04        |
| ANT_PPD     | 98           | 97           | 5,90E-01        | 4,80E-01        |
| ANT_SAUR    | 123          | 133          | 1,00E-04        | 1,00E-04        |
| AVP1_BRI1   | 109          | 111          | 9,00E-04        | 9,00E-04        |
| AVP1_DA1    | 106          | 109          | 3,70E-02        | 6,00E-04        |
| AVP1_EOD    | 101          | 115          | 9,20E-01        | 1,00E-04        |
| AVP1_EXP10  | 106          | 118          | 1,90E-02        | 1,00E-04        |
| AVP1_PPD    | 94           | 90           | 1,20E-02        | 2,00E-04        |
| BRI1_DA1    | 135          | 117          | 1,00E-04        | 1,00E-04        |
| BRI1_EOD    | 138          | 133          | 1,00E-04        | 1,00E-04        |
| BRI1_EXP10  | 128          | 119          | 1,00E-04        | 1,00E-04        |
| BRI1_GA20OX | 117          | 100          | 1,00E-04        | 9,40E-01        |
| BRI1_GRF5   | 121          | 120          | 1,00E-04        | 1,00E-04        |
| BRI1_PPD    | 130          | 105          | 1,00E-04        | 9,30E-02        |
| BRI1_SAUR   | 137          | 119          | 1,00E-04        | 1,00E-04        |
| DA1_EXP10   | 100          | 136          | 9,30E-01        | 1,00E-04        |
| DA1_GA20OX  | 105          | 130          | 9,50E-02        | 1,00E-04        |
| DA1_GRF5    | 80           | 115          | 1,00E-04        | 1,00E-04        |
| DA1_JAW     | 50           | 87           | 1,00E-04        | 1,00E-04        |
| DA1_PPD     | 90           | 106          | 1,00E-04        | 4,40E-02        |
| DA1_SAUR    | 98           | 124          | 3,90E-01        | 1,00E-04        |
| EOD_PPD     | 88           | 92           | 1,00E-04        | 2,50E-03        |
| EXP10_GRF5  | 75           | 87           | 1,00E-04        | 1,00E-04        |
| EXP10_JAW   | 58           | 79           | 1,00E-04        | 1,00E-04        |
| EXP10_PPD   | 99           | 92           | 5,50E-01        | 7,70E-03        |
| EXP10_SAUR  | 105          | 106          | 8,70E-02        | 2,80E-02        |
| GA20OX_GRF5 | 98           | 121          | 4,80E-01        | 1,00E-04        |

|                    |     |     |          |          |
|--------------------|-----|-----|----------|----------|
| <b>GA20OX_JAW</b>  | 58  | 87  | 1,00E-04 | 1,00E-04 |
| <b>GA20OX_PPD</b>  | 107 | 109 | 4,50E-02 | 7,00E-03 |
| <b>GA20OX_SAUR</b> | 106 | 116 | 8,60E-01 | 5,00E-04 |
| <b>GRF5_JAW</b>    | 53  | 71  | 1,00E-04 | 1,00E-04 |
| <b>GRF5_PPD</b>    | 100 | 91  | 9,70E-01 | 7,30E-03 |
| <b>GRF5_SAUR</b>   | 136 | 135 | 1,00E-04 | 1,00E-04 |
| <b>JAW_PPD</b>     | 117 | 74  | 1,00E-04 | 1,00E-04 |
| <b>JAW_SAUR</b>    | 116 | 79  | 1,00E-04 | 1,00E-04 |
| <b>PPD_SAUR</b>    | 129 | 115 | 1,00E-04 | 1,00E-04 |
| <b>SAMBA_AN3</b>   | 110 | 116 | 1,00E-03 | 1,00E-04 |
| <b>SAMBA_ANT</b>   | 115 | 115 | 1,00E-04 | 1,00E-04 |
| <b>SAMBA_AVP1</b>  | 119 | 102 | 1,00E-04 | 4,20E-01 |
| <b>SAMBA_BRI1</b>  | 107 | 103 | 1,50E-02 | 3,40E-01 |
| <b>SAMBA_DA1</b>   | 115 | 113 | 1,00E-04 | 1,00E-04 |
| <b>SAMBA_EOD</b>   | 113 | 125 | 1,00E-04 | 1,00E-04 |
| <b>SAMBA_EXP10</b> | 108 | 115 | 2,90E-02 | 1,00E-04 |
| <b>SAMBA_PPD</b>   | 99  | 91  | 8,10E-01 | 7,80E-03 |
| <b>SAMBA_SAUR</b>  | 117 | 116 | 1,00E-04 | 1,00E-04 |
