# Supplementary material for: Combining growth-promoting genes leads to positive epistasis in Arabidopsis thaliana
Source: eLife journal article supplement (doi:10.7554/elife.02252), 2014-04-29
Supplement: supp [file elife_poa_e02252_Supplementary_File_2.pdf › elife_poa_e02252_Supplementary_File_2.pdf]

|                | Forward                      | Reverse                   |
|----------------|------------------------------|---------------------------|
| <i>AN3</i>     | CAGGGAGAAGGAGGGTCACAC        | ATTGAAGATCGAGCCGCCATTAG   |
| <i>ANT</i>     | AGGTGGTTCCAACAAAGAAGTCAG     | GACGGTCTTAAGCTCAGCATTAGG  |
| <i>AVP1</i>    | GCAGGCAGTTCAACACCATCC        | GCATGACAAGGCAACCAGGAG     |
| <i>BRI1</i>    | AAAGTTGCGGTTGCGTGTTTG        | GTTGACTGTGAATCTATCCCTGACC |
| <i>EOD</i>     | GGGCTCCTCCTCTTCTTTTC         | CACACAAGCGAAAATGGAAC      |
| <i>EXP10</i>   | CTTCAACGCCGCTCCTGCC          | GATCGCCGCCGAGTGAACG       |
| <i>GA200X1</i> | CATCAACGTTCTCGAGCTTGATGTTT   | GCGGCTCGTGATTTCATGAGCG    |
| <i>GRF5</i>    | TCAGTTCAATGTCTTAGCCTCTGC     | CCCAACTCCTCCAACTCTCTCC    |
| <i>JAW</i>     | TCCAATTTTCTTGATTAATCTTTCCTGC | CACCTATCCATGGCGATGCCTTA   |
| <i>PPD2</i>    | CCGGTCTATCATGCATTTTG         | AAGCAGGTGCCTTTTCAAGT      |
| <i>SAMBA</i>   | ACGAAGCTATGCGTGTTTTG         | GGACCTTCGAACATCCAACT      |
| <i>SAUR19</i>  | GAAGATTCTAAGCCGCTCCA         | TGACGGTTGGCTCAAGTATG      |
