# Supplementary material for: Combining growth-promoting genes leads to positive epistasis in Arabidopsis thaliana
Source: eLife journal article supplement (doi:10.7554/elife.02252), 2014-04-29
Supplement: supp [file elife_poa_e02252_Supplementary_File_3.pdf › elife_poa_e02252_Supplementary_File_3.pdf]

|                                      |                                                                                                                                                                                                                                                                                                                                       |
|--------------------------------------|---------------------------------------------------------------------------------------------------------------------------------------------------------------------------------------------------------------------------------------------------------------------------------------------------------------------------------------|
| <b>Cross</b>                         | Gene combination                                                                                                                                                                                                                                                                                                                      |
| <b>Genotype</b>                      | Genotype within the combination, ordered as follows: cross, parent 1, parent 2, reference                                                                                                                                                                                                                                             |
|                                      | Proportion of the Variance attributed by the different factors in the model. To calculate this, all factors were treated as random factors. These values are determined per gene combination and are therefore the same for each of the Genotypes per combination.                                                                    |
| <b>VarE</b>                          | Proportion of the variance explained by the factor Experiment                                                                                                                                                                                                                                                                         |
| <b>VarG</b>                          | Proportion of the variance explained by the factor Genotype                                                                                                                                                                                                                                                                           |
| <b>VarGxE</b>                        | Proportion of the variance explained by the interaction of Genotype and Experiment                                                                                                                                                                                                                                                    |
| <b>VarResidual</b>                   | Residual Variance                                                                                                                                                                                                                                                                                                                     |
|                                      | The rosette area was estimated by Least Square Means (LSM) based on the applied mixed model. We included the interaction of Genotype and Experiment (GxE) in the model when appropriate. Here we provide the ratio of Observed and Expected (calculated using a multiplicative model) of both the model with and without interaction. |
| <b>Obs/Exp (selected)</b>            |                                                                                                                                                                                                                                                                                                                                       |
| <b>Obs/Exp (interaction)</b>         | LSM calculated using the mixed model with interaction of GxE included                                                                                                                                                                                                                                                                 |
| <b>Obs/Exp (without interaction)</b> | LSM calculated using the mixed model without interaction terms                                                                                                                                                                                                                                                                        |
| <b>P interaction</b>                 | p-value for the significance of the GxE interaction, based on a likelihood ratio test                                                                                                                                                                                                                                                 |
| <b>P synergistic</b>                 | FDR corrected p-value for synergistic effect (see Material and Methods for model details)                                                                                                                                                                                                                                             |

| Cross      | Genotype   | VarE | VarG  | VarGxE | VarResidual | Obs/Exp<br>(selected) | Obs/Exp<br>(interaction) | Obs/Exp<br>(without<br>interaction) | P interaction | P synergistic |
|------------|------------|------|-------|--------|-------------|-----------------------|--------------------------|-------------------------------------|---------------|---------------|
| BRI1_EOD   | BRI1_EOD   | 0    | 59.55 | 1.39   | 39.05       | 47.74                 | 47.84                    | 47.74                               | 2.10E-01      | 0.0001        |
| BRI1_EOD   | BRI1_COL   | 0    | 59.55 | 1.39   | 39.05       | 47.74                 | 47.84                    | 47.74                               | 2.10E-01      | 0.0001        |
| BRI1_EOD   | COL_EOD    | 0    | 59.55 | 1.39   | 39.05       | 47.74                 | 47.84                    | 47.74                               | 2.10E-01      | 0.0001        |
| BRI1_EOD   | COL        | 0    | 59.55 | 1.39   | 39.05       | 47.74                 | 47.84                    | 47.74                               | 2.10E-01      | 0.0001        |
| BRI1_EXP10 | BRI1_EXP10 | 0.15 | 36.35 | 11.4   | 52.11       | 33.03                 | 33.03                    | 35.46                               | 9.20E-03      | 0.0001        |
| BRI1_EXP10 | BRI1_COL   | 0.15 | 36.35 | 11.4   | 52.11       | 33.03                 | 33.03                    | 35.46                               | 9.20E-03      | 0.0001        |
| BRI1_EXP10 | COL_EXP10  | 0.15 | 36.35 | 11.4   | 52.11       | 33.03                 | 33.03                    | 35.46                               | 9.20E-03      | 0.0001        |
| BRI1_EXP10 | COL        | 0.15 | 36.35 | 11.4   | 52.11       | 33.03                 | 33.03                    | 35.46                               | 9.20E-03      | 0.0001        |
| BRI1_GRF5  | BRI1_GRF5  | 0.75 | 35.15 | 3.12   | 60.98       | 32.93                 | 32.63                    | 32.93                               | 1.00E-01      | 0.0001        |
| BRI1_GRF5  | BRI1_COL   | 0.75 | 35.15 | 3.12   | 60.98       | 32.93                 | 32.63                    | 32.93                               | 1.00E-01      | 0.0001        |
| BRI1_GRF5  | COL_GRF5   | 0.75 | 35.15 | 3.12   | 60.98       | 32.93                 | 32.63                    | 32.93                               | 1.00E-01      | 0.0001        |
| BRI1_GRF5  | COL        | 0.75 | 35.15 | 3.12   | 60.98       | 32.93                 | 32.63                    | 32.93                               | 1.00E-01      | 0.0001        |
| BRI1_SAUR  | BRI1_SAUR  | 0.79 | 51.56 | 1.34   | 46.31       | 31.89                 | 32.30                    | 31.89                               | 5.80E-01      | 0.0001        |
| BRI1_SAUR  | BRI1_COL   | 0.79 | 51.56 | 1.34   | 46.31       | 31.89                 | 32.30                    | 31.89                               | 5.80E-01      | 0.0001        |
| BRI1_SAUR  | COL_SAUR   | 0.79 | 51.56 | 1.34   | 46.31       | 31.89                 | 32.30                    | 31.89                               | 5.80E-01      | 0.0001        |
| BRI1_SAUR  | COL        | 0.79 | 51.56 | 1.34   | 46.31       | 31.89                 | 32.30                    | 31.89                               | 5.80E-01      | 0.0001        |
| GRF5_SAUR  | GRF5_SAUR  | 2.55 | 57.7  | 3.89   | 35.86       | 31.44                 | 30.75                    | 31.44                               | 5.80E-02      | 0.0001        |
| GRF5_SAUR  | GRF5_COL   | 2.55 | 57.7  | 3.89   | 35.86       | 31.44                 | 30.75                    | 31.44                               | 5.80E-02      | 0.0001        |
| GRF5_SAUR  | COL_SAUR   | 2.55 | 57.7  | 3.89   | 35.86       | 31.44                 | 30.75                    | 31.44                               | 5.80E-02      | 0.0001        |
| GRF5_SAUR  | COL        | 2.55 | 57.7  | 3.89   | 35.86       | 31.44                 | 30.75                    | 31.44                               | 5.80E-02      | 0.0001        |
| BRI1_DA1   | BRI1_DA1   | 0    | 50.48 | 4.37   | 45.14       | 30.09                 | 30.09                    | 31.24                               | 4.20E-02      | 0.0001        |
| BRI1_DA1   | BRI1_COL   | 0    | 50.48 | 4.37   | 45.14       | 30.09                 | 30.09                    | 31.24                               | 4.20E-02      | 0.0001        |
| BRI1_DA1   | COL_DA1    | 0    | 50.48 | 4.37   | 45.14       | 30.09                 | 30.09                    | 31.24                               | 4.20E-02      | 0.0001        |
| BRI1_DA1   | COL        | 0    | 50.48 | 4.37   | 45.14       | 30.09                 | 30.09                    | 31.24                               | 4.20E-02      | 0.0001        |
| PPD_SAUR   | PPD_SAUR   | 2.78 | 42.78 | 3.44   | 51          | 24.14                 | 24.51                    | 24.14                               | 1.80E-01      | 0.0001        |
| PPD_SAUR   | PPD_COL    | 2.78 | 42.78 | 3.44   | 51          | 24.14                 | 24.51                    | 24.14                               | 1.80E-01      | 0.0001        |
| PPD_SAUR   | COL_SAUR   | 2.78 | 42.78 | 3.44   | 51          | 24.14                 | 24.51                    | 24.14                               | 1.80E-01      | 0.0001        |
| PPD_SAUR   | COL        | 2.78 | 42.78 | 3.44   | 51          | 24.14                 | 24.51                    | 24.14                               | 1.80E-01      | 0.0001        |

|             |             |      |       |       |       |       |       |       |          |        |
|-------------|-------------|------|-------|-------|-------|-------|-------|-------|----------|--------|
| SAMBA_EOD   | SAMBA_EOD   | 0    | 35.23 | 4.02  | 60.75 | 20.92 | 19.14 | 20.92 | 4.30E-01 | 0.0001 |
| SAMBA_EOD   | SAMBA_COL   | 0    | 35.23 | 4.02  | 60.75 | 20.92 | 19.14 | 20.92 | 4.30E-01 | 0.0001 |
| SAMBA_EOD   | COL_EOD     | 0    | 35.23 | 4.02  | 60.75 | 20.92 | 19.14 | 20.92 | 4.30E-01 | 0.0001 |
| SAMBA_EOD   | COL         | 0    | 35.23 | 4.02  | 60.75 | 20.92 | 19.14 | 20.92 | 4.30E-01 | 0.0001 |
| ANT_SAUR    | ANT_SAUR    | 1.13 | 59.43 | 1.87  | 37.56 | 18.32 | 17.86 | 18.32 | 6.50E-01 | 0.0007 |
| ANT_SAUR    | ANT_COL     | 1.13 | 59.43 | 1.87  | 37.56 | 18.32 | 17.86 | 18.32 | 6.50E-01 | 0.0007 |
| ANT_SAUR    | COL_SAUR    | 1.13 | 59.43 | 1.87  | 37.56 | 18.32 | 17.86 | 18.32 | 6.50E-01 | 0.0007 |
| ANT_SAUR    | COL         | 1.13 | 59.43 | 1.87  | 37.56 | 18.32 | 17.86 | 18.32 | 6.50E-01 | 0.0007 |
| BRI1_PPD    | BRI1_PPD    | 0    | 49.25 | 1.09  | 49.66 | 16.13 | 16.59 | 16.13 | 3.30E-01 | 0.0001 |
| BRI1_PPD    | BRI1_COL    | 0    | 49.25 | 1.09  | 49.66 | 16.13 | 16.59 | 16.13 | 3.30E-01 | 0.0001 |
| BRI1_PPD    | COL_PPD     | 0    | 49.25 | 1.09  | 49.66 | 16.13 | 16.59 | 16.13 | 3.30E-01 | 0.0001 |
| BRI1_PPD    | COL         | 0    | 49.25 | 1.09  | 49.66 | 16.13 | 16.59 | 16.13 | 3.30E-01 | 0.0001 |
| ANT_EOD     | ANT_EOD     | 1.88 | 48.86 | 0     | 49.26 | 15.01 | 15.01 | 15.01 | 0.00E+00 | 0.0017 |
| ANT_EOD     | ANT_COL     | 1.88 | 48.86 | 0     | 49.26 | 15.01 | 15.01 | 15.01 | 0.00E+00 | 0.0017 |
| ANT_EOD     | COL_EOD     | 1.88 | 48.86 | 0     | 49.26 | 15.01 | 15.01 | 15.01 | 0.00E+00 | 0.0017 |
| ANT_EOD     | COL         | 1.88 | 48.86 | 0     | 49.26 | 15.01 | 15.01 | 15.01 | 0.00E+00 | 0.0017 |
| SAMBA_SAUR  | SAMBA_SAUR  | 0    | 34.64 | 4.45  | 60.91 | 12.55 | 12.86 | 12.55 | 1.30E-01 | 0.0002 |
| SAMBA_SAUR  | SAMBA_COL   | 0    | 34.64 | 4.45  | 60.91 | 12.55 | 12.86 | 12.55 | 1.30E-01 | 0.0002 |
| SAMBA_SAUR  | COL_SAUR    | 0    | 34.64 | 4.45  | 60.91 | 12.55 | 12.86 | 12.55 | 1.30E-01 | 0.0002 |
| SAMBA_SAUR  | COL         | 0    | 34.64 | 4.45  | 60.91 | 12.55 | 12.86 | 12.55 | 1.30E-01 | 0.0002 |
| SAMBA_AN3   | SAMBA_AN3   | 1.48 | 10.74 | 15.84 | 71.94 | 12.53 | 9.42  | 12.53 | 5.70E-02 | 0.0014 |
| SAMBA_AN3   | SAMBA_COL   | 1.48 | 10.74 | 15.84 | 71.94 | 12.53 | 9.42  | 12.53 | 5.70E-02 | 0.0014 |
| SAMBA_AN3   | COL_AN3     | 1.48 | 10.74 | 15.84 | 71.94 | 12.53 | 9.42  | 12.53 | 5.70E-02 | 0.0014 |
| SAMBA_AN3   | COL         | 1.48 | 10.74 | 15.84 | 71.94 | 12.53 | 9.42  | 12.53 | 5.70E-02 | 0.0014 |
| JAW_SAUR    | JAW_SAUR    | 0.98 | 59.22 | 3.32  | 36.48 | 12.05 | 12.77 | 12.05 | 9.20E-02 | 0.0067 |
| JAW_SAUR    | JAW_COL     | 0.98 | 59.22 | 3.32  | 36.48 | 12.05 | 12.77 | 12.05 | 9.20E-02 | 0.0067 |
| JAW_SAUR    | COL_SAUR    | 0.98 | 59.22 | 3.32  | 36.48 | 12.05 | 12.77 | 12.05 | 9.20E-02 | 0.0067 |
| JAW_SAUR    | COL         | 0.98 | 59.22 | 3.32  | 36.48 | 12.05 | 12.77 | 12.05 | 9.20E-02 | 0.0067 |
| SAMBA_EXP10 | SAMBA_EXP10 | 0    | 12.83 | 2.3   | 84.87 | 11.18 | 10.81 | 11.18 | 5.20E-01 | 0.018  |
| SAMBA_EXP10 | SAMBA_COL   | 0    | 12.83 | 2.3   | 84.87 | 11.18 | 10.81 | 11.18 | 5.20E-01 | 0.018  |
| SAMBA_EXP10 | COL_EXP10   | 0    | 12.83 | 2.3   | 84.87 | 11.18 | 10.81 | 11.18 | 5.20E-01 | 0.018  |

|             |             |      |       |       |       |       |       |       |          |        |
|-------------|-------------|------|-------|-------|-------|-------|-------|-------|----------|--------|
| SAMBA_EXP10 | COL         | 0    | 12.83 | 2.3   | 84.87 | 11.18 | 10.81 | 11.18 | 5.20E-01 | 0.018  |
| SAMBA_ANT   | SAMBA_ANT   | 0    | 27.22 | 2.62  | 70.16 | 10.96 | 10.08 | 10.96 | 2.90E-01 | 0.0053 |
| SAMBA_ANT   | SAMBA_COL   | 0    | 27.22 | 2.62  | 70.16 | 10.96 | 10.08 | 10.96 | 2.90E-01 | 0.0053 |
| SAMBA_ANT   | COL_ANT     | 0    | 27.22 | 2.62  | 70.16 | 10.96 | 10.08 | 10.96 | 2.90E-01 | 0.0053 |
| SAMBA_ANT   | COL         | 0    | 27.22 | 2.62  | 70.16 | 10.96 | 10.08 | 10.96 | 2.90E-01 | 0.0053 |
| AN3_GRF5    | AN3_GRF5    | 6.22 | 5.67  | 29.14 | 58.97 | 10.6  | 10.60 | 16.62 | 1.10E-04 | 0.0001 |
| AN3_GRF5    | AN3_COL     | 6.22 | 5.67  | 29.14 | 58.97 | 10.6  | 10.60 | 16.62 | 1.10E-04 | 0.0001 |
| AN3_GRF5    | COL_GRF5    | 6.22 | 5.67  | 29.14 | 58.97 | 10.6  | 10.60 | 16.62 | 1.10E-04 | 0.0001 |
| AN3_GRF5    | COL         | 6.22 | 5.67  | 29.14 | 58.97 | 10.6  | 10.60 | 16.62 | 1.10E-04 | 0.0001 |
| SAMBA_DA1   | SAMBA_DA1   | 3.7  | 26.56 | 0     | 69.74 | 10.56 | 10.56 | 10.56 | 1.00E+00 | 0.0083 |
| SAMBA_DA1   | SAMBA_COL   | 3.7  | 26.56 | 0     | 69.74 | 10.56 | 10.56 | 10.56 | 1.00E+00 | 0.0083 |
| SAMBA_DA1   | COL_DA1     | 3.7  | 26.56 | 0     | 69.74 | 10.56 | 10.56 | 10.56 | 1.00E+00 | 0.0083 |
| SAMBA_DA1   | COL         | 3.7  | 26.56 | 0     | 69.74 | 10.56 | 10.56 | 10.56 | 1.00E+00 | 0.0083 |
| BRI1_GA200X | BRI1_GA200X | 2.06 | 24.08 | 0.24  | 73.62 | 10.39 | 10.45 | 10.39 | 9.30E-01 | 0.0052 |
| BRI1_GA200X | BRI1_COL    | 2.06 | 24.08 | 0.24  | 73.62 | 10.39 | 10.45 | 10.39 | 9.30E-01 | 0.0052 |
| BRI1_GA200X | COL_GA200X  | 2.06 | 24.08 | 0.24  | 73.62 | 10.39 | 10.45 | 10.39 | 9.30E-01 | 0.0052 |
| BRI1_GA200X | COL         | 2.06 | 24.08 | 0.24  | 73.62 | 10.39 | 10.45 | 10.39 | 9.30E-01 | 0.0052 |
| AVP1_EXP10  | AVP1_EXP10  | 0    | 24.34 | 13.97 | 61.69 | 10.27 | 10.27 | 9.19  | 1.50E-04 | 0.0063 |
| AVP1_EXP10  | AVP1_COL    | 0    | 24.34 | 13.97 | 61.69 | 10.27 | 10.27 | 9.19  | 1.50E-04 | 0.0063 |
| AVP1_EXP10  | COL_EXP10   | 0    | 24.34 | 13.97 | 61.69 | 10.27 | 10.27 | 9.19  | 1.50E-04 | 0.0063 |
| AVP1_EXP10  | COL         | 0    | 24.34 | 13.97 | 61.69 | 10.27 | 10.27 | 9.19  | 1.50E-04 | 0.0063 |
| AN3_EOD     | AN3_EOD     | 5.05 | 18.2  | 0     | 76.75 | 8.74  | 8.74  | 8.74  | 0.00E+00 | 0.016  |
| AN3_EOD     | AN3_COL     | 5.05 | 18.2  | 0     | 76.75 | 8.74  | 8.74  | 8.74  | 0.00E+00 | 0.016  |
| AN3_EOD     | COL_EOD     | 5.05 | 18.2  | 0     | 76.75 | 8.74  | 8.74  | 8.74  | 0.00E+00 | 0.016  |
| AN3_EOD     | COL         | 5.05 | 18.2  | 0     | 76.75 | 8.74  | 8.74  | 8.74  | 0.00E+00 | 0.016  |
| AVP1_EOD    | AVP1_EOD    | 0    | 18.79 | 13.64 | 67.58 | 7.93  | 7.93  | 7.14  | 1.80E-03 | 0.036  |
| AVP1_EOD    | AVP1_COL    | 0    | 18.79 | 13.64 | 67.58 | 7.93  | 7.93  | 7.14  | 1.80E-03 | 0.036  |
| AVP1_EOD    | COL_EOD     | 0    | 18.79 | 13.64 | 67.58 | 7.93  | 7.93  | 7.14  | 1.80E-03 | 0.036  |
| AVP1_EOD    | COL         | 0    | 18.79 | 13.64 | 67.58 | 7.93  | 7.93  | 7.14  | 1.80E-03 | 0.036  |
| AN3_EXP10   | AN3_EXP10   | 1.68 | 11.49 | 12.93 | 73.9  | 7.77  | 10.33 | 7.77  | 7.10E-02 | 0.066  |
| AN3_EXP10   | AN3_COL     | 1.68 | 11.49 | 12.93 | 73.9  | 7.77  | 10.33 | 7.77  | 7.10E-02 | 0.066  |

|             |             |      |       |       |       |      |       |       |          |       |
|-------------|-------------|------|-------|-------|-------|------|-------|-------|----------|-------|
| AN3_EXP10   | COL_EXP10   | 1.68 | 11.49 | 12.93 | 73.9  | 7.77 | 10.33 | 7.77  | 7.10E-02 | 0.066 |
| AN3_EXP10   | COL         | 1.68 | 11.49 | 12.93 | 73.9  | 7.77 | 10.33 | 7.77  | 7.10E-02 | 0.066 |
| AN3_GA200X  | AN3_GA200X  | 0    | 28.04 | 1.35  | 70.6  | 7.27 | 7.37  | 7.27  | 4.40E-01 | 0.035 |
| AN3_GA200X  | AN3_COL     | 0    | 28.04 | 1.35  | 70.6  | 7.27 | 7.37  | 7.27  | 4.40E-01 | 0.035 |
| AN3_GA200X  | COL_GA200X  | 0    | 28.04 | 1.35  | 70.6  | 7.27 | 7.37  | 7.27  | 4.40E-01 | 0.035 |
| AN3_GA200X  | COL         | 0    | 28.04 | 1.35  | 70.6  | 7.27 | 7.37  | 7.27  | 4.40E-01 | 0.035 |
| GA200X_GRF5 | GA200X_GRF5 | 0.9  | 35.6  | 7.59  | 55.91 | 6.97 | 6.97  | 6.9   | 7.70E-03 | 0.075 |
| GA200X_GRF5 | GA200X_COL  | 0.9  | 35.6  | 7.59  | 55.91 | 6.97 | 6.97  | 6.9   | 7.70E-03 | 0.075 |
| GA200X_GRF5 | COL_GRF5    | 0.9  | 35.6  | 7.59  | 55.91 | 6.97 | 6.97  | 6.9   | 7.70E-03 | 0.075 |
| GA200X_GRF5 | COL         | 0.9  | 35.6  | 7.59  | 55.91 | 6.97 | 6.97  | 6.9   | 7.70E-03 | 0.075 |
| JAW_PPD     | JAW_PPD     | 0.32 | 66.74 | 2.16  | 30.78 | 5.35 | 5.35  | 6.4   | 4.30E-02 | 0.11  |
| JAW_PPD     | JAW_COL     | 0.32 | 66.74 | 2.16  | 30.78 | 5.35 | 5.35  | 6.4   | 4.30E-02 | 0.11  |
| JAW_PPD     | COL_PPD     | 0.32 | 66.74 | 2.16  | 30.78 | 5.35 | 5.35  | 6.4   | 4.30E-02 | 0.11  |
| JAW_PPD     | COL         | 0.32 | 66.74 | 2.16  | 30.78 | 5.35 | 5.35  | 6.4   | 4.30E-02 | 0.11  |
| ANT_EXP10   | ANT_EXP10   | 2.21 | 34.5  | 0     | 63.29 | 3.96 | 3.96  | 3.96  | 1.00E+00 | 0.38  |
| ANT_EXP10   | ANT_COL     | 2.21 | 34.5  | 0     | 63.29 | 3.96 | 3.96  | 3.96  | 1.00E+00 | 0.38  |
| ANT_EXP10   | COL_EXP10   | 2.21 | 34.5  | 0     | 63.29 | 3.96 | 3.96  | 3.96  | 1.00E+00 | 0.38  |
| ANT_EXP10   | COL         | 2.21 | 34.5  | 0     | 63.29 | 3.96 | 3.96  | 3.96  | 1.00E+00 | 0.38  |
| AVP1_BRI1   | AVP1_BRI1   | 6.66 | 19.52 | 12.1  | 61.72 | 3.06 | 3.06  | 0.81  | 1.20E-05 | 0.8   |
| AVP1_BRI1   | AVP1_COL    | 6.66 | 19.52 | 12.1  | 61.72 | 3.06 | 3.06  | 0.81  | 1.20E-05 | 0.8   |
| AVP1_BRI1   | COL_BRI1    | 6.66 | 19.52 | 12.1  | 61.72 | 3.06 | 3.06  | 0.81  | 1.20E-05 | 0.8   |
| AVP1_BRI1   | COL         | 6.66 | 19.52 | 12.1  | 61.72 | 3.06 | 3.06  | 0.81  | 1.20E-05 | 0.8   |
| DA1_EXP10   | DA1_EXP10   | 0.84 | 68.22 | 1.67  | 29.27 | 3.04 | 2.83  | 3.04  | 3.80E-01 | 0.34  |
| DA1_EXP10   | DA1_COL     | 0.84 | 68.22 | 1.67  | 29.27 | 3.04 | 2.83  | 3.04  | 3.80E-01 | 0.34  |
| DA1_EXP10   | COL_EXP10   | 0.84 | 68.22 | 1.67  | 29.27 | 3.04 | 2.83  | 3.04  | 3.80E-01 | 0.34  |
| DA1_EXP10   | COL         | 0.84 | 68.22 | 1.67  | 29.27 | 3.04 | 2.83  | 3.04  | 3.80E-01 | 0.34  |
| GA200X_SAUR | GA200X_SAUR | 0    | 20.06 | 25.37 | 54.57 | 2.46 | 2.46  | -4.35 | 3.10E-06 | 0.23  |
| GA200X_SAUR | GA200X_COL  | 0    | 20.06 | 25.37 | 54.57 | 2.46 | 2.46  | -4.35 | 3.10E-06 | 0.23  |
| GA200X_SAUR | COL_SAUR    | 0    | 20.06 | 25.37 | 54.57 | 2.46 | 2.46  | -4.35 | 3.10E-06 | 0.23  |
| GA200X_SAUR | COL         | 0    | 20.06 | 25.37 | 54.57 | 2.46 | 2.46  | -4.35 | 3.10E-06 | 0.23  |
| ANT_GRF5    | ANT_GRF5    | 0    | 34.53 | 9.47  | 56.01 | 2.38 | 2.38  | 5.88  | 1.70E-02 | 0.23  |

|            |            |      |       |       |       |       |       |       |          |      |
|------------|------------|------|-------|-------|-------|-------|-------|-------|----------|------|
| ANT_GRF5   | ANT_COL    | 0    | 34.53 | 9.47  | 56.01 | 2.38  | 2.38  | 5.88  | 1.70E-02 | 0.23 |
| ANT_GRF5   | COL_GRF5   | 0    | 34.53 | 9.47  | 56.01 | 2.38  | 2.38  | 5.88  | 1.70E-02 | 0.23 |
| ANT_GRF5   | COL        | 0    | 34.53 | 9.47  | 56.01 | 2.38  | 2.38  | 5.88  | 1.70E-02 | 0.23 |
| AVP1_DA1   | AVP1_DA1   | 0    | 13.05 | 17.28 | 69.66 | 1.9   | 1.90  | 2.04  | 5.70E-05 | 0.53 |
| AVP1_DA1   | AVP1_COL   | 0    | 13.05 | 17.28 | 69.66 | 1.9   | 1.90  | 2.04  | 5.70E-05 | 0.53 |
| AVP1_DA1   | COL_DA1    | 0    | 13.05 | 17.28 | 69.66 | 1.9   | 1.90  | 2.04  | 5.70E-05 | 0.53 |
| AVP1_DA1   | COL        | 0    | 13.05 | 17.28 | 69.66 | 1.9   | 1.90  | 2.04  | 5.70E-05 | 0.53 |
| EXP10_SAUR | EXP10_SAUR | 0.25 | 8.74  | 5.16  | 85.86 | 0.74  | 1.35  | 0.74  | 4.20E-01 | 0.81 |
| EXP10_SAUR | EXP10_COL  | 0.25 | 8.74  | 5.16  | 85.86 | 0.74  | 1.35  | 0.74  | 4.20E-01 | 0.81 |
| EXP10_SAUR | COL_SAUR   | 0.25 | 8.74  | 5.16  | 85.86 | 0.74  | 1.35  | 0.74  | 4.20E-01 | 0.81 |
| EXP10_SAUR | COL        | 0.25 | 8.74  | 5.16  | 85.86 | 0.74  | 1.35  | 0.74  | 4.20E-01 | 0.81 |
| SAMBA_AVP1 | SAMBA_AVP1 | 3.72 | 41.26 | 2.3   | 52.73 | -0.29 | -0.95 | -0.29 | 5.80E-01 | 0.92 |
| SAMBA_AVP1 | SAMBA_COL  | 3.72 | 41.26 | 2.3   | 52.73 | -0.29 | -0.95 | -0.29 | 5.80E-01 | 0.92 |
| SAMBA_AVP1 | COL_AVP1   | 3.72 | 41.26 | 2.3   | 52.73 | -0.29 | -0.95 | -0.29 | 5.80E-01 | 0.92 |
| SAMBA_AVP1 | COL        | 3.72 | 41.26 | 2.3   | 52.73 | -0.29 | -0.95 | -0.29 | 5.80E-01 | 0.92 |
| AN3_ANT    | AN3_ANT    | 3.88 | 6.9   | 2.67  | 86.55 | -0.9  | -0.35 | -0.9  | 4.50E-01 | 0.76 |
| AN3_ANT    | AN3_COL    | 3.88 | 6.9   | 2.67  | 86.55 | -0.9  | -0.35 | -0.9  | 4.50E-01 | 0.76 |
| AN3_ANT    | COL_ANT    | 3.88 | 6.9   | 2.67  | 86.55 | -0.9  | -0.35 | -0.9  | 4.50E-01 | 0.76 |
| AN3_ANT    | COL        | 3.88 | 6.9   | 2.67  | 86.55 | -0.9  | -0.35 | -0.9  | 4.50E-01 | 0.76 |
| AN3_SAUR   | AN3_SAUR   | 3.5  | 3.58  | 5.24  | 87.68 | -1.14 | -0.77 | -1.14 | 2.60E-01 | 0.7  |
| AN3_SAUR   | AN3_COL    | 3.5  | 3.58  | 5.24  | 87.68 | -1.14 | -0.77 | -1.14 | 2.60E-01 | 0.7  |
| AN3_SAUR   | COL_SAUR   | 3.5  | 3.58  | 5.24  | 87.68 | -1.14 | -0.77 | -1.14 | 2.60E-01 | 0.7  |
| AN3_SAUR   | COL        | 3.5  | 3.58  | 5.24  | 87.68 | -1.14 | -0.77 | -1.14 | 2.60E-01 | 0.7  |
| SAMBA_BRI1 | SAMBA_BRI1 | 0    | 13.16 | 2.34  | 84.5  | -1.14 | -0.44 | -1.14 | 2.10E-01 | 0.73 |
| SAMBA_BRI1 | SAMBA_COL  | 0    | 13.16 | 2.34  | 84.5  | -1.14 | -0.44 | -1.14 | 2.10E-01 | 0.73 |
| SAMBA_BRI1 | COL_BRI1   | 0    | 13.16 | 2.34  | 84.5  | -1.14 | -0.44 | -1.14 | 2.10E-01 | 0.73 |
| SAMBA_BRI1 | COL        | 0    | 13.16 | 2.34  | 84.5  | -1.14 | -0.44 | -1.14 | 2.10E-01 | 0.73 |
| ANT_BRI1   | ANT_BRI1   | 0    | 31.61 | 3.07  | 65.32 | -1.31 | -0.86 | -1.31 | 1.20E-01 | 0.77 |
| ANT_BRI1   | ANT_COL    | 0    | 31.61 | 3.07  | 65.32 | -1.31 | -0.86 | -1.31 | 1.20E-01 | 0.77 |
| ANT_BRI1   | COL_BRI1   | 0    | 31.61 | 3.07  | 65.32 | -1.31 | -0.86 | -1.31 | 1.20E-01 | 0.77 |
| ANT_BRI1   | COL        | 0    | 31.61 | 3.07  | 65.32 | -1.31 | -0.86 | -1.31 | 1.20E-01 | 0.77 |

|            |            |      |       |      |       |       |       |       |          |       |
|------------|------------|------|-------|------|-------|-------|-------|-------|----------|-------|
| DA1_GA200X | DA1_GA200X | 0    | 63.65 | 2.51 | 33.84 | -1.36 | -1.56 | -1.36 | 1.40E-01 | 0.68  |
| DA1_GA200X | DA1_COL    | 0    | 63.65 | 2.51 | 33.84 | -1.36 | -1.56 | -1.36 | 1.40E-01 | 0.68  |
| DA1_GA200X | COL_GA200X | 0    | 63.65 | 2.51 | 33.84 | -1.36 | -1.56 | -1.36 | 1.40E-01 | 0.68  |
| DA1_GA200X | COL        | 0    | 63.65 | 2.51 | 33.84 | -1.36 | -1.56 | -1.36 | 1.40E-01 | 0.68  |
| ANT_AVP1   | ANT_AVP1   | 0    | 49.42 | 12   | 38.58 | -1.6  | -1.60 | 3.08  | 9.10E-04 | 0.46  |
| ANT_AVP1   | ANT_COL    | 0    | 49.42 | 12   | 38.58 | -1.6  | -1.60 | 3.08  | 9.10E-04 | 0.46  |
| ANT_AVP1   | COL_AVP1   | 0    | 49.42 | 12   | 38.58 | -1.6  | -1.60 | 3.08  | 9.10E-04 | 0.46  |
| ANT_AVP1   | COL        | 0    | 49.42 | 12   | 38.58 | -1.6  | -1.60 | 3.08  | 9.10E-04 | 0.46  |
| GA200X_PPD | GA200X_PPD | 0    | 29.9  | 3.3  | 66.8  | -4.8  | -4.02 | -4.8  | 1.50E-01 | 0.21  |
| GA200X_PPD | GA200X_COL | 0    | 29.9  | 3.3  | 66.8  | -4.8  | -4.02 | -4.8  | 1.50E-01 | 0.21  |
| GA200X_PPD | COL_PPD    | 0    | 29.9  | 3.3  | 66.8  | -4.8  | -4.02 | -4.8  | 1.50E-01 | 0.21  |
| GA200X_PPD | COL        | 0    | 29.9  | 3.3  | 66.8  | -4.8  | -4.02 | -4.8  | 1.50E-01 | 0.21  |
| AN3_AVP1   | AN3_AVP1   | 7.51 | 35.52 | 4.15 | 52.82 | -4.94 | -5.84 | -4.94 | 1.80E-01 | 0.11  |
| AN3_AVP1   | AN3_COL    | 7.51 | 35.52 | 4.15 | 52.82 | -4.94 | -5.84 | -4.94 | 1.80E-01 | 0.11  |
| AN3_AVP1   | COL_AVP1   | 7.51 | 35.52 | 4.15 | 52.82 | -4.94 | -5.84 | -4.94 | 1.80E-01 | 0.11  |
| AN3_AVP1   | COL        | 7.51 | 35.52 | 4.15 | 52.82 | -4.94 | -5.84 | -4.94 | 1.80E-01 | 0.11  |
| AN3_DA1    | AN3_DA1    | 0.15 | 0     | 15   | 84.85 | -5.27 | -5.27 | -4.89 | 1.00E-03 | 0.17  |
| AN3_DA1    | AN3_COL    | 0.15 | 0     | 15   | 84.85 | -5.27 | -5.27 | -4.89 | 1.00E-03 | 0.17  |
| AN3_DA1    | COL_DA1    | 0.15 | 0     | 15   | 84.85 | -5.27 | -5.27 | -4.89 | 1.00E-03 | 0.17  |
| AN3_DA1    | COL        | 0.15 | 0     | 15   | 84.85 | -5.27 | -5.27 | -4.89 | 1.00E-03 | 0.17  |
| AN3_BRI1   | AN3_BRI1   | 0    | 2.53  | 9.56 | 87.92 | -5.49 | -5.49 | -6.61 | 1.40E-02 | 0.055 |
| AN3_BRI1   | AN3_COL    | 0    | 2.53  | 9.56 | 87.92 | -5.49 | -5.49 | -6.61 | 1.40E-02 | 0.055 |
| AN3_BRI1   | COL_BRI1   | 0    | 2.53  | 9.56 | 87.92 | -5.49 | -5.49 | -6.61 | 1.40E-02 | 0.055 |
| AN3_BRI1   | COL        | 0    | 2.53  | 9.56 | 87.92 | -5.49 | -5.49 | -6.61 | 1.40E-02 | 0.055 |
| DA1_SAUR   | DA1_SAUR   | 2.19 | 56.62 | 1.55 | 39.63 | -5.95 | -6.13 | -5.95 | 4.80E-01 | 0.066 |
| DA1_SAUR   | DA1_COL    | 2.19 | 56.62 | 1.55 | 39.63 | -5.95 | -6.13 | -5.95 | 4.80E-01 | 0.066 |
| DA1_SAUR   | COL_SAUR   | 2.19 | 56.62 | 1.55 | 39.63 | -5.95 | -6.13 | -5.95 | 4.80E-01 | 0.066 |
| DA1_SAUR   | COL        | 2.19 | 56.62 | 1.55 | 39.63 | -5.95 | -6.13 | -5.95 | 4.80E-01 | 0.066 |
| AN3_JAW    | AN3_JAW    | 0    | 64.59 | 5.97 | 29.44 | -5.96 | -5.96 | -6.34 | 7.90E-04 | 0.071 |
| AN3_JAW    | AN3_COL    | 0    | 64.59 | 5.97 | 29.44 | -5.96 | -5.96 | -6.34 | 7.90E-04 | 0.071 |
| AN3_JAW    | COL_JAW    | 0    | 64.59 | 5.97 | 29.44 | -5.96 | -5.96 | -6.34 | 7.90E-04 | 0.071 |

|           |           |      |       |       |       |        |        |        |          |        |
|-----------|-----------|------|-------|-------|-------|--------|--------|--------|----------|--------|
| AN3_JAW   | COL       | 0    | 64.59 | 5.97  | 29.44 | -5.96  | -5.96  | -6.34  | 7.90E-04 | 0.071  |
| ANT_DA1   | ANT_DA1   | 0    | 17.63 | 0     | 82.37 | -10.21 | -10.21 | -10.21 | 1.00E+00 | 0.094  |
| ANT_DA1   | ANT_COL   | 0    | 17.63 | 0     | 82.37 | -10.21 | -10.21 | -10.21 | 1.00E+00 | 0.094  |
| ANT_DA1   | COL_DA1   | 0    | 17.63 | 0     | 82.37 | -10.21 | -10.21 | -10.21 | 1.00E+00 | 0.094  |
| ANT_DA1   | COL       | 0    | 17.63 | 0     | 82.37 | -10.21 | -10.21 | -10.21 | 1.00E+00 | 0.094  |
| AN3_PPD   | AN3_PPD   | 2.38 | 14.23 | 0     | 83.39 | -10.29 | -10.29 | -10.29 | 1.00E+00 | 0.002  |
| AN3_PPD   | AN3_COL   | 2.38 | 14.23 | 0     | 83.39 | -10.29 | -10.29 | -10.29 | 1.00E+00 | 0.002  |
| AN3_PPD   | COL_PPD   | 2.38 | 14.23 | 0     | 83.39 | -10.29 | -10.29 | -10.29 | 1.00E+00 | 0.002  |
| AN3_PPD   | COL       | 2.38 | 14.23 | 0     | 83.39 | -10.29 | -10.29 | -10.29 | 1.00E+00 | 0.002  |
| GRF5_PPD  | GRF5_PPD  | 0    | 10.41 | 2.8   | 86.79 | -10.94 | -10.92 | -10.94 | 3.50E-01 | 0.0053 |
| GRF5_PPD  | GRF5_COL  | 0    | 10.41 | 2.8   | 86.79 | -10.94 | -10.92 | -10.94 | 3.50E-01 | 0.0053 |
| GRF5_PPD  | COL_PPD   | 0    | 10.41 | 2.8   | 86.79 | -10.94 | -10.92 | -10.94 | 3.50E-01 | 0.0053 |
| GRF5_PPD  | COL       | 0    | 10.41 | 2.8   | 86.79 | -10.94 | -10.92 | -10.94 | 3.50E-01 | 0.0053 |
| SAMBA_PPD | SAMBA_PPD | 0    | 6.73  | 12.66 | 80.62 | -12.03 | -9.96  | -12.03 | 8.70E-02 | 0.0019 |
| SAMBA_PPD | SAMBA_COL | 0    | 6.73  | 12.66 | 80.62 | -12.03 | -9.96  | -12.03 | 8.70E-02 | 0.0019 |
| SAMBA_PPD | COL_PPD   | 0    | 6.73  | 12.66 | 80.62 | -12.03 | -9.96  | -12.03 | 8.70E-02 | 0.0019 |
| SAMBA_PPD | COL       | 0    | 6.73  | 12.66 | 80.62 | -12.03 | -9.96  | -12.03 | 8.70E-02 | 0.0019 |
| EXP10_PPD | EXP10_PPD | 0.22 | 11.24 | 2.22  | 86.32 | -12.13 | -11.74 | -12.13 | 5.10E-01 | 0.0003 |
| EXP10_PPD | EXP10_COL | 0.22 | 11.24 | 2.22  | 86.32 | -12.13 | -11.74 | -12.13 | 5.10E-01 | 0.0003 |
| EXP10_PPD | COL_PPD   | 0.22 | 11.24 | 2.22  | 86.32 | -12.13 | -11.74 | -12.13 | 5.10E-01 | 0.0003 |
| EXP10_PPD | COL       | 0.22 | 11.24 | 2.22  | 86.32 | -12.13 | -11.74 | -12.13 | 5.10E-01 | 0.0003 |
| DA1_GRF5  | DA1_GRF5  | 2    | 56.63 | 10.05 | 31.32 | -12.66 | -12.66 | -11.66 | 3.10E-07 | 0.0002 |
| DA1_GRF5  | DA1_COL   | 2    | 56.63 | 10.05 | 31.32 | -12.66 | -12.66 | -11.66 | 3.10E-07 | 0.0002 |
| DA1_GRF5  | COL_GRF5  | 2    | 56.63 | 10.05 | 31.32 | -12.66 | -12.66 | -11.66 | 3.10E-07 | 0.0002 |
| DA1_GRF5  | COL       | 2    | 56.63 | 10.05 | 31.32 | -12.66 | -12.66 | -11.66 | 3.10E-07 | 0.0002 |
| ANT_PPD   | ANT_PPD   | 4.01 | 15.05 | 5.62  | 75.32 | -12.94 | -13.32 | -12.94 | 3.40E-01 | 0.0025 |
| ANT_PPD   | ANT_COL   | 4.01 | 15.05 | 5.62  | 75.32 | -12.94 | -13.32 | -12.94 | 3.40E-01 | 0.0025 |
| ANT_PPD   | COL_PPD   | 4.01 | 15.05 | 5.62  | 75.32 | -12.94 | -13.32 | -12.94 | 3.40E-01 | 0.0025 |
| ANT_PPD   | COL       | 4.01 | 15.05 | 5.62  | 75.32 | -12.94 | -13.32 | -12.94 | 3.40E-01 | 0.0025 |
| AVP1_PPD  | AVP1_PPD  | 0.12 | 11.6  | 9.49  | 78.79 | -15.63 | -15.63 | -16.09 | 6.90E-03 | 0.0001 |
| AVP1_PPD  | AVP1_COL  | 0.12 | 11.6  | 9.49  | 78.79 | -15.63 | -15.63 | -16.09 | 6.90E-03 | 0.0001 |



|            |            |      |       |      |       |        |        |        |          |        |
|------------|------------|------|-------|------|-------|--------|--------|--------|----------|--------|
| AVP1_PPD   | COL_PPD    | 0.12 | 11.6  | 9.49 | 78.79 | -15.63 | -15.63 | -16.09 | 6.90E-03 | 0.0001 |
| AVP1_PPD   | COL        | 0.12 | 11.6  | 9.49 | 78.79 | -15.63 | -15.63 | -16.09 | 6.90E-03 | 0.0001 |
| EXP10_GRF5 | EXP10_GRF5 | 0    | 53.64 | 1.52 | 44.84 | -17.42 | -17.61 | -17.42 | 3.80E-01 | 0.0001 |
| EXP10_GRF5 | EXP10_COL  | 0    | 53.64 | 1.52 | 44.84 | -17.42 | -17.61 | -17.42 | 3.80E-01 | 0.0001 |
| EXP10_GRF5 | COL_GRF5   | 0    | 53.64 | 1.52 | 44.84 | -17.42 | -17.61 | -17.42 | 3.80E-01 | 0.0001 |
| EXP10_GRF5 | COL        | 0    | 53.64 | 1.52 | 44.84 | -17.42 | -17.61 | -17.42 | 3.80E-01 | 0.0001 |
| DA1_PPD    | DA1_PPD    | 0.09 | 46.84 | 4.37 | 48.7  | -19.56 | -19.06 | -19.56 | 1.80E-01 | 0.0001 |
| DA1_PPD    | DA1_COL    | 0.09 | 46.84 | 4.37 | 48.7  | -19.56 | -19.06 | -19.56 | 1.80E-01 | 0.0001 |
| DA1_PPD    | COL_PPD    | 0.09 | 46.84 | 4.37 | 48.7  | -19.56 | -19.06 | -19.56 | 1.80E-01 | 0.0001 |
| DA1_PPD    | COL        | 0.09 | 46.84 | 4.37 | 48.7  | -19.56 | -19.06 | -19.56 | 1.80E-01 | 0.0001 |
| EOD_PPD    | EOD_PPD    | 3.83 | 27.69 | 0    | 68.47 | -22.03 | -22.03 | -22.03 | 1.00E+00 | 0.0001 |
| EOD_PPD    | EOD_COL    | 3.83 | 27.69 | 0    | 68.47 | -22.03 | -22.03 | -22.03 | 1.00E+00 | 0.0001 |
| EOD_PPD    | COL_PPD    | 3.83 | 27.69 | 0    | 68.47 | -22.03 | -22.03 | -22.03 | 1.00E+00 | 0.0001 |
| EOD_PPD    | COL        | 3.83 | 27.69 | 0    | 68.47 | -22.03 | -22.03 | -22.03 | 1.00E+00 | 0.0001 |
| GA200X_JAW | GA200X_JAW | 0.12 | 76.24 | 6.93 | 16.7  | -24.06 | -24.06 | -25.73 | 2.30E-05 | 0.0001 |
| GA200X_JAW | GA200X_COL | 0.12 | 76.24 | 6.93 | 16.7  | -24.06 | -24.06 | -25.73 | 2.30E-05 | 0.0001 |
| GA200X_JAW | COL_JAW    | 0.12 | 76.24 | 6.93 | 16.7  | -24.06 | -24.06 | -25.73 | 2.30E-05 | 0.0001 |
| GA200X_JAW | COL        | 0.12 | 76.24 | 6.93 | 16.7  | -24.06 | -24.06 | -25.73 | 2.30E-05 | 0.0001 |
| EXP10_JAW  | EXP10_JAW  | 0    | 79.04 | 2.03 | 18.93 | -24.79 | -24.59 | -24.79 | 1.70E-01 | 0.0001 |
| EXP10_JAW  | EXP10_COL  | 0    | 79.04 | 2.03 | 18.93 | -24.79 | -24.59 | -24.79 | 1.70E-01 | 0.0001 |
| EXP10_JAW  | COL_JAW    | 0    | 79.04 | 2.03 | 18.93 | -24.79 | -24.59 | -24.79 | 1.70E-01 | 0.0001 |
| EXP10_JAW  | COL        | 0    | 79.04 | 2.03 | 18.93 | -24.79 | -24.59 | -24.79 | 1.70E-01 | 0.0001 |
| GRF5_JAW   | GRF5_JAW   | 0.82 | 84.11 | 0.23 | 14.85 | -30.41 | -30.48 | -30.41 | 8.50E-01 | 0.0001 |
| GRF5_JAW   | GRF5_COL   | 0.82 | 84.11 | 0.23 | 14.85 | -30.41 | -30.48 | -30.41 | 8.50E-01 | 0.0001 |
| GRF5_JAW   | COL_JAW    | 0.82 | 84.11 | 0.23 | 14.85 | -30.41 | -30.48 | -30.41 | 8.50E-01 | 0.0001 |
| GRF5_JAW   | COL        | 0.82 | 84.11 | 0.23 | 14.85 | -30.41 | -30.48 | -30.41 | 8.50E-01 | 0.0001 |
| DA1_JAW    | DA1_JAW    | 0.92 | 85.67 | 0.05 | 13.36 | -34.37 | -34.38 | -34.37 | 9.30E-01 | 0.0001 |
| DA1_JAW    | DA1_COL    | 0.92 | 85.67 | 0.05 | 13.36 | -34.37 | -34.38 | -34.37 | 9.30E-01 | 0.0001 |
| DA1_JAW    | COL_JAW    | 0.92 | 85.67 | 0.05 | 13.36 | -34.37 | -34.38 | -34.37 | 9.30E-01 | 0.0001 |
| DA1_JAW    | COL        | 0.92 | 85.67 | 0.05 | 13.36 | -34.37 | -34.38 | -34.37 | 9.30E-01 | 0.0001 |
