# Supplementary figures and images for: Combining growth-promoting genes leads to positive epistasis in Arabidopsis thaliana
Source: eLife journal article supplement (doi:10.7554/elife.02252), 2014-04-29

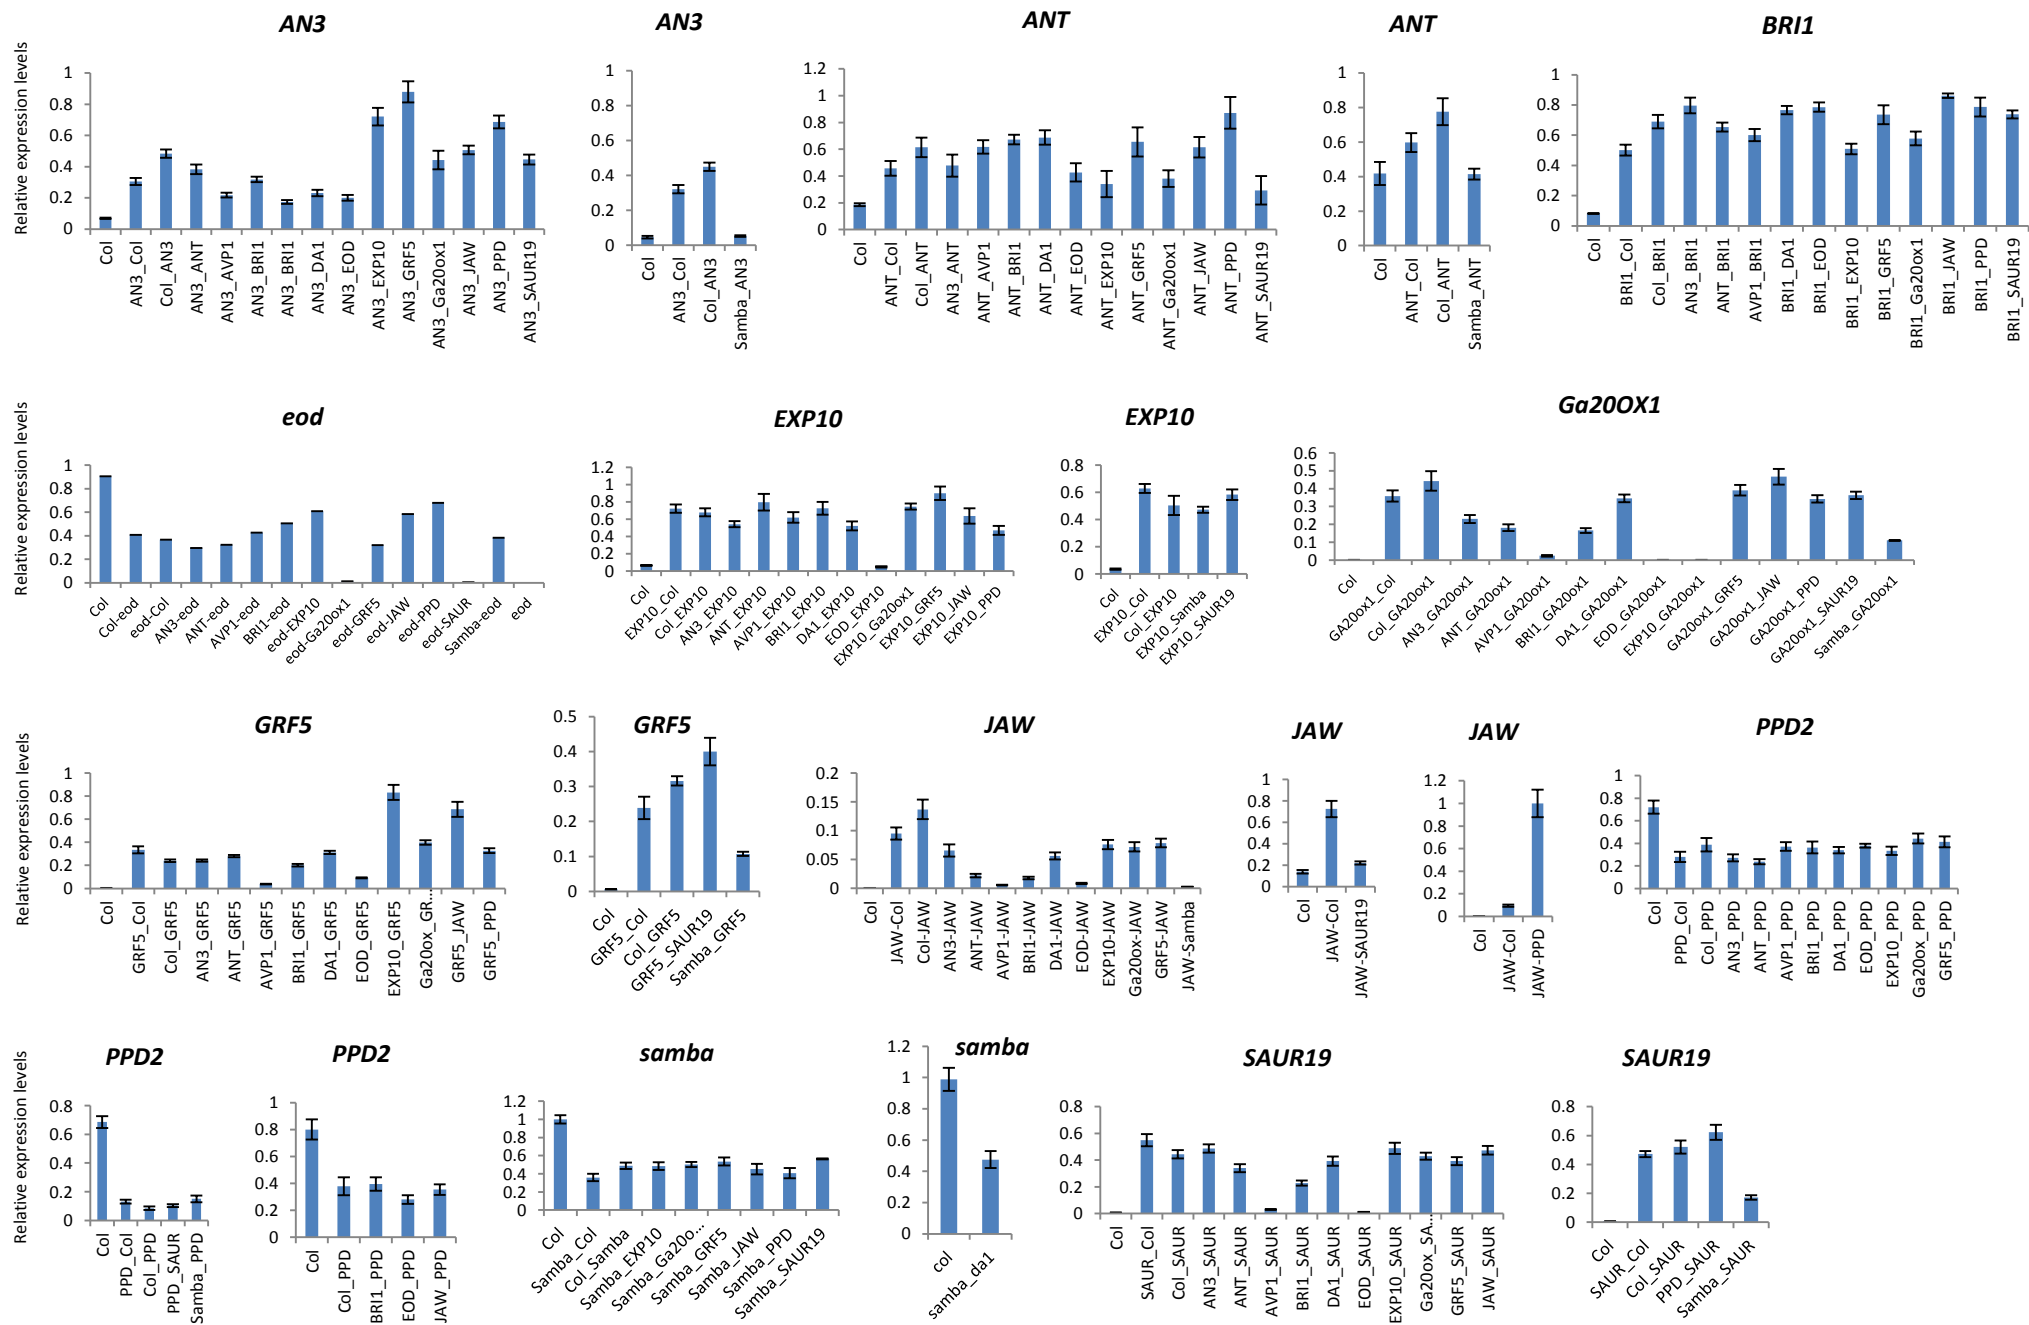

Supplement: supp [file elife_poa_e02252_Figure_1_figure_supplement_2.pdf › elife_poa_e02252_Figure_1_figure_supplement_2.pdf]

**a**

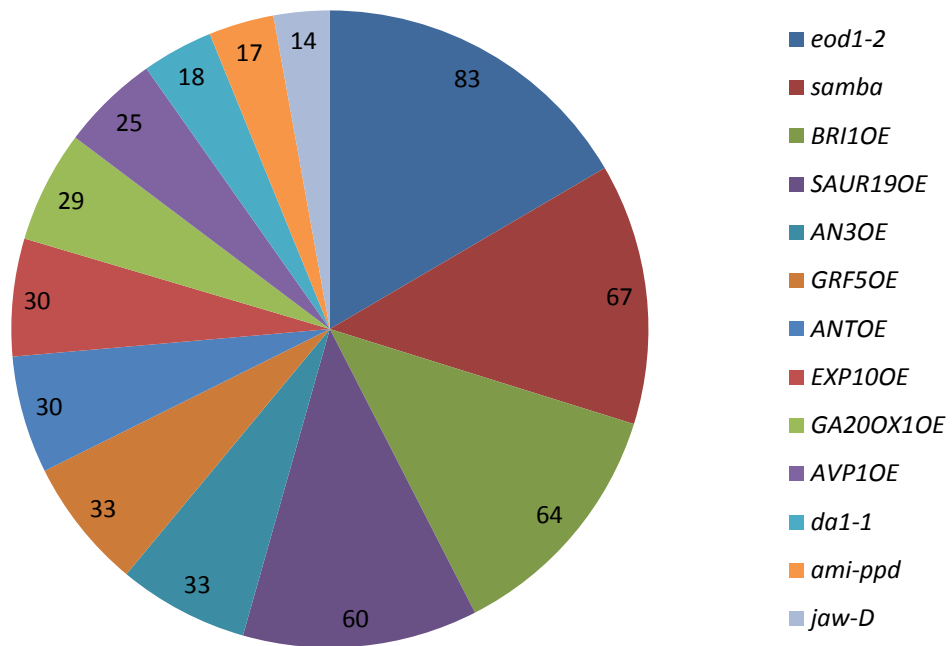

**b**

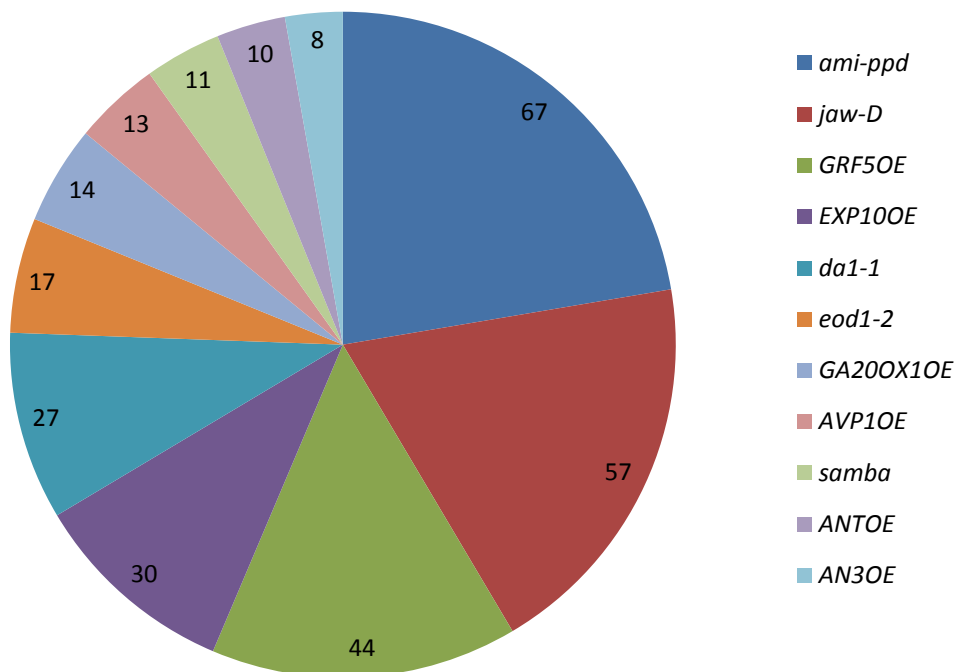

Supplement: supp [file elife_poa_e02252_Figure_2_figure_supplement_1.pdf › elife_poa_e02252_Figure_2_figure_supplement_1.pdf]

**a**

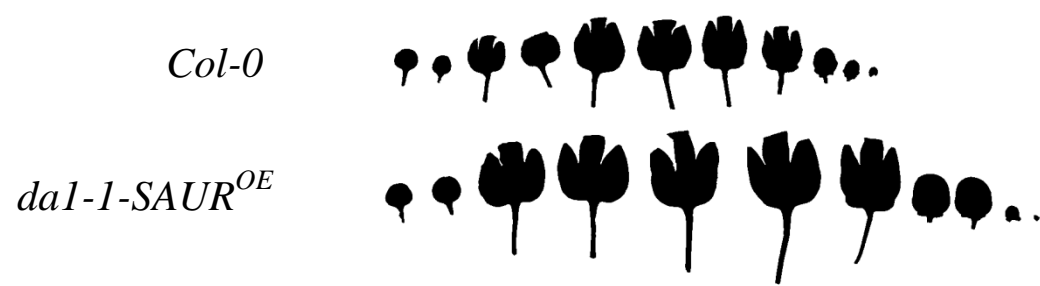

**b**

|                                  | L0    | L1    | L3    | L4    | L5    | L6   | R     |
|----------------------------------|-------|-------|-------|-------|-------|------|-------|
| <i>da1-1-SAUR19<sup>OE</sup></i> | 136   | 178   | 172   | 164   | 159   | 124  | 161   |
| FDR                              | 1E-04 | 1E-04 | 1E-04 | 1E-04 | 1E-04 | 0.01 | 1E-04 |

Supplement: supp [file elife_poa_e02252_Figure_2_figure_supplement_2.pdf › elife_poa_e02252_Figure_2_figure_supplement_2.pdf]

***PPD2***

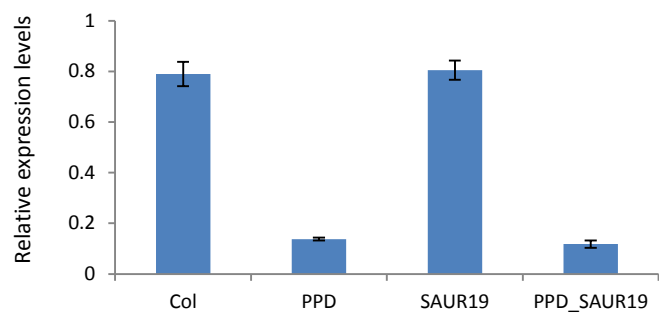

***SAUR19***

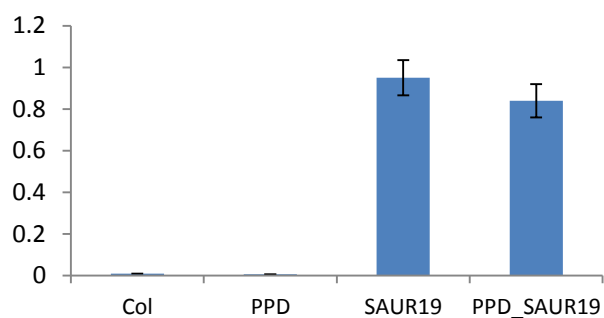

***samba***

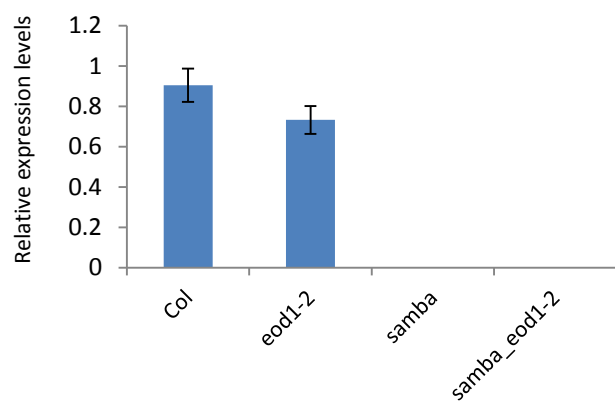

***eod***

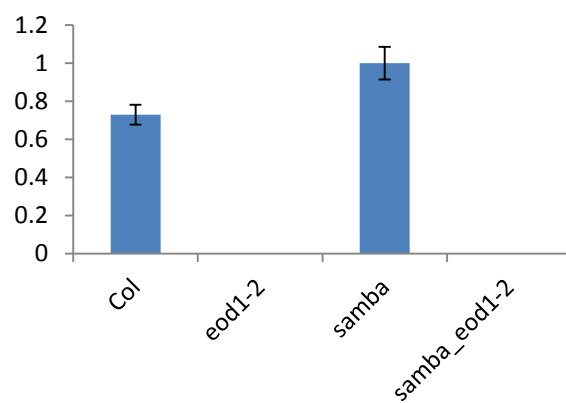

***SAUR19***

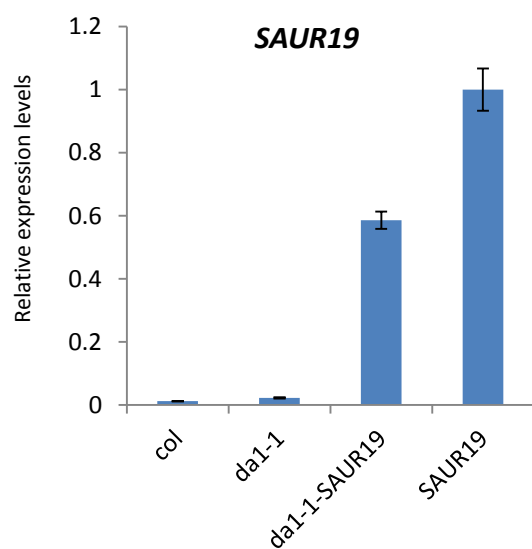

Supplement: supp [file elife_poa_e02252_Figure_3_figure_supplement_4.pdf › elife_poa_e02252_Figure_3_figure_supplement_4.pdf]
